# Supplementary material for: Genome-wide characterization, phylogenetic and expression analysis of ABCG gene subfamily in cucumber (Cucumis sativus L.)
Source: Front Plant Sci. 2023 May 11;14:1178710. doi: 10.3389/fpls.2023.1178710 (PMC10211247; doi:10.3389/fpls.2023.1178710)
Supplement: Supplementary file 2 [file Table_1.xlsx]

## Sheet: Table S1
Supplementary Table 1. Statistics of the CsABCG genes clusters on chromosomes of cucumber
Chromosome	Number of genes	Gene clusters	Number of PDR	Number of WBC	Percentage
1	3	0	1	2	0.0909091
2	5	0	3	2	0.151515
3	11	3	4	7	0.333333
4	2	0	0	2	0.0606061
5	3	0	0	3	0.0909091
6	7	0	4	3	0.212121
7	2	0	1	1	0.0606061
Total	33	3	13	20	1

## Sheet: Table S2
Supplementary Table 2. The cis-acting elements of the promoters of the CsABCG genes in cucumber
Gene ID	Site Name	Sequence	Position	Strand	Function
Csa1G042910.1	ABRE4	CACGTA	615	+
Csa1G042910.1	A-box	CCGTCC	461	-	cis-acting regulatory element
Csa1G042910.1	Box 4	ATTAAT	111	+	part of a conserved DNA module involved in light responsiveness
Csa1G042910.1	Box 4	ATTAAT	1813	-	part of a conserved DNA module involved in light responsiveness
Csa1G042910.1	ABRE3a	TACGTG	615	-
Csa1G042910.1	CGTCA-motif	CGTCA	413	+	cis-acting regulatory element involved in the MeJA-responsiveness
Csa1G042910.1	box S	AGCCACC	42	-
Csa1G042910.1	ARE	AAACCA	964	+	cis-acting regulatory element essential for the anaerobic induction
Csa1G042910.1	ARE	AAACCA	1071	-	cis-acting regulatory element essential for the anaerobic induction
Csa1G042910.1	ARE	AAACCA	1172	+	cis-acting regulatory element essential for the anaerobic induction
Csa1G042910.1	ARE	AAACCA	1387	-	cis-acting regulatory element essential for the anaerobic induction
Csa1G042910.1	ARE	AAACCA	1776	-	cis-acting regulatory element essential for the anaerobic induction
Csa1G042910.1	ARE	AAACCA	1794	-	cis-acting regulatory element essential for the anaerobic induction
Csa1G042910.1	ARE	AAACCA	1852	+	cis-acting regulatory element essential for the anaerobic induction
Csa1G042910.1	ARE	AAACCA	1880	+	cis-acting regulatory element essential for the anaerobic induction
Csa1G042910.1	CCAAT-box	CAACGG	28	-	MYBHv1 binding site
Csa1G042910.1	CCAAT-box	CAACGG	294	+	MYBHv1 binding site
Csa1G042910.1		motif_sequence	191	-	short_function
Csa1G042910.1		motif_sequence	269	-	short_function
Csa1G042910.1		motif_sequence	286	+	short_function
Csa1G042910.1		motif_sequence	358	+	short_function
Csa1G042910.1		motif_sequence	971	+	short_function
Csa1G042910.1		motif_sequence	1078	-	short_function
Csa1G042910.1		motif_sequence	1553	-	short_function
Csa1G042910.1		motif_sequence	1950	+	short_function
Csa1G042910.1	DRE core	GCCGAC	171	-
Csa1G042910.1	DRE core	GCCGAC	276	+
Csa1G042910.1	ABRE	ACGTG	615	-	cis-acting element involved in the abscisic acid responsiveness
Csa1G042910.1	ABRE	ACGTG	951	-	cis-acting element involved in the abscisic acid responsiveness
Csa1G042910.1	CCGTCC-box	CCGTCC	461	-
Csa1G042910.1	Unnamed__6	taTAAATATct	903	-
Csa1G042910.1	G-box	TACGTG	615	-	cis-acting regulatory element involved in light responsiveness
Csa1G042910.1	TCCC-motif	TCTCCCT	1038	-	part of a light responsive element
Csa1G042910.1	AAAC-motif	CAATCAAAACCT	218	+	light responsive element
Csa1G042910.1	Unnamed__1	GAATTTAATTAA	112	-	60K protein binding site
Csa1G042910.1	Unnamed__1	CGTGG	984	+
Csa1G042910.1	Unnamed__1	CGTGG	1608	+
Csa1G042910.1	MYB recognition site	CCGTTG	28	+
Csa1G042910.1	MYB recognition site	CCGTTG	294	-
Csa1G042910.1	as-1	TGACG	413	-
Csa1G042910.1	LTR	CCGAAA	1074	-	cis-acting element involved in low-temperature responsiveness
Csa1G042910.1	TATA-box	TACAAAA	381	-	core promoter element around -30 of transcription start
Csa1G042910.1	TATA-box	TATAA	586	-	core promoter element around -30 of transcription start
Csa1G042910.1	TATA-box	TATA	587	+	core promoter element around -30 of transcription start
Csa1G042910.1	TATA-box	TACATAAA	713	-	core promoter element around -30 of transcription start
Csa1G042910.1	TATA-box	TATACA	717	-	core promoter element around -30 of transcription start
Csa1G042910.1	TATA-box	TATA	719	+	core promoter element around -30 of transcription start
Csa1G042910.1	TATA-box	TATAA	790	-	core promoter element around -30 of transcription start
Csa1G042910.1	TATA-box	TATA	791	+	core promoter element around -30 of transcription start
Csa1G042910.1	TATA-box	ATATAA	825	+	core promoter element around -30 of transcription start
Csa1G042910.1	TATA-box	TATA	826	+	core promoter element around -30 of transcription start
Csa1G042910.1	TATA-box	TATA	848	+	core promoter element around -30 of transcription start
Csa1G042910.1	TATA-box	TATAA	854	-	core promoter element around -30 of transcription start
Csa1G042910.1	TATA-box	TATA	855	+	core promoter element around -30 of transcription start
Csa1G042910.1	TATA-box	taTATAAAtc	904	-	core promoter element around -30 of transcription start
Csa1G042910.1	TATA-box	ATATAT	905	+	core promoter element around -30 of transcription start
Csa1G042910.1	TATA-box	TATATA	906	+	core promoter element around -30 of transcription start
Csa1G042910.1	TATA-box	ATATAT	907	+	core promoter element around -30 of transcription start
Csa1G042910.1	TATA-box	TATATA	908	+	core promoter element around -30 of transcription start
Csa1G042910.1	TATA-box	ATATAT	909	+	core promoter element around -30 of transcription start
Csa1G042910.1	TATA-box	TATATA	910	+	core promoter element around -30 of transcription start
Csa1G042910.1	TATA-box	TATA	912	+	core promoter element around -30 of transcription start
Csa1G042910.1	TATA-box	TATAA	1034	-	core promoter element around -30 of transcription start
Csa1G042910.1	TATA-box	TATA	1035	-	core promoter element around -30 of transcription start
Csa1G042910.1	TATA-box	TATAAAA	1200	-	core promoter element around -30 of transcription start
Csa1G042910.1	TATA-box	TATAAA	1201	-	core promoter element around -30 of transcription start
Csa1G042910.1	TATA-box	TATAA	1202	-	core promoter element around -30 of transcription start
Csa1G042910.1	TATA-box	TATA	1203	-	core promoter element around -30 of transcription start
Csa1G042910.1	TATA-box	TACAAAA	1248	-	core promoter element around -30 of transcription start
Csa1G042910.1	TATA-box	TATA	1343	-	core promoter element around -30 of transcription start
Csa1G042910.1	TATA-box	TATAA	1397	-	core promoter element around -30 of transcription start
Csa1G042910.1	TATA-box	TATA	1398	-	core promoter element around -30 of transcription start
Csa1G042910.1	TATA-box	TATAAATA	1450	-	core promoter element around -30 of transcription start
Csa1G042910.1	TATA-box	TATAAAT	1451	-	core promoter element around -30 of transcription start
Csa1G042910.1	TATA-box	TATAAA	1452	-	core promoter element around -30 of transcription start
Csa1G042910.1	TATA-box	TATAA	1453	-	core promoter element around -30 of transcription start
Csa1G042910.1	TATA-box	TATA	1454	-	core promoter element around -30 of transcription start
Csa1G042910.1	TATA-box	ATATAT	1522	-	core promoter element around -30 of transcription start
Csa1G042910.1	TATA-box	TATATA	1523	-	core promoter element around -30 of transcription start
Csa1G042910.1	TATA-box	ATATAA	1524	+	core promoter element around -30 of transcription start
Csa1G042910.1	TATA-box	TATA	1525	-	core promoter element around -30 of transcription start
Csa1G042910.1	TATA-box	TAAAGATT	1650	+	core promoter element around -30 of transcription start
Csa1G042910.1	TATA-box	ATTATA	1668	+	core promoter element around -30 of transcription start
Csa1G042910.1	TATA-box	TATAA	1669	-	core promoter element around -30 of transcription start
Csa1G042910.1	TATA-box	TATA	1670	-	core promoter element around -30 of transcription start
Csa1G042910.1	TATA-box	ATATAA	1957	+	core promoter element around -30 of transcription start
Csa1G042910.1	TATA-box	TATA	1958	-	core promoter element around -30 of transcription start
Csa1G042910.1	AE-box	AGAAACAA	441	+	part of a module for light response
Csa1G042910.1	AT~TATA-box	TATATA	906	+
Csa1G042910.1	AT~TATA-box	TATATA	908	+
Csa1G042910.1	AT~TATA-box	TATATA	910	+
Csa1G042910.1	AT~TATA-box	TATATA	1523	-
Csa1G042910.1	CAAT-box	CAAT	131	-
Csa1G042910.1	CAAT-box	CAAT	144	-
Csa1G042910.1	CAAT-box	CAAT	330	+
Csa1G042910.1	CAAT-box	CAAAT	332	-	common cis-acting element in promoter and enhancer regions
Csa1G042910.1	CAAT-box	CAAT	446	+
Csa1G042910.1	CAAT-box	CAAT	478	-
Csa1G042910.1	CAAT-box	CAAT	499	-
Csa1G042910.1	CAAT-box	CAAT	504	-
Csa1G042910.1	CAAT-box	CAAT	521	-
Csa1G042910.1	CAAT-box	CCCAATTT	540	-	common cis-acting element in promoter and enhancer regions
Csa1G042910.1	CAAT-box	CCAAT	542	-	common cis-acting element in promoter and enhancer regions
Csa1G042910.1	CAAT-box	CAAT	569	+
Csa1G042910.1	CAAT-box	CCAAT	602	-	common cis-acting element in promoter and enhancer regions
Csa1G042910.1	CAAT-box	CAAT	645	-
Csa1G042910.1	CAAT-box	CAAAT	740	+	common cis-acting element in promoter and enhancer regions
Csa1G042910.1	CAAT-box	CAAT	743	-
Csa1G042910.1	CAAT-box	CAAT	748	+
Csa1G042910.1	CAAT-box	CAAT	798	+
Csa1G042910.1	CAAT-box	CAAT	800	-
Csa1G042910.1	CAAT-box	CAAT	814	+
Csa1G042910.1	CAAT-box	CAAAT	822	+	common cis-acting element in promoter and enhancer regions
Csa1G042910.1	CAAT-box	CAAAT	919	-	common cis-acting element in promoter and enhancer regions
Csa1G042910.1	CAAT-box	CAAT	924	-
Csa1G042910.1	CAAT-box	CCAAT	935	+	common cis-acting element in promoter and enhancer regions
Csa1G042910.1	CAAT-box	CAAT	936	+
Csa1G042910.1	CAAT-box	CAAAT	968	+	common cis-acting element in promoter and enhancer regions
Csa1G042910.1	CAAT-box	CAAAT	1054	+	common cis-acting element in promoter and enhancer regions
Csa1G042910.1	CAAT-box	CCAAT	1069	-	common cis-acting element in promoter and enhancer regions
Csa1G042910.1	CAAT-box	CAAAT	1105	-	common cis-acting element in promoter and enhancer regions
Csa1G042910.1	CAAT-box	CAAT	1117	+
Csa1G042910.1	CAAT-box	CAAAT	1128	-	common cis-acting element in promoter and enhancer regions
Csa1G042910.1	CAAT-box	CAAT	1183	+
Csa1G042910.1	CAAT-box	CAAT	1193	+
Csa1G042910.1	CAAT-box	CAAT	1268	-
Csa1G042910.1	CAAT-box	CAAT	1274	-
Csa1G042910.1	CAAT-box	CAAAT	1281	-	common cis-acting element in promoter and enhancer regions
Csa1G042910.1	CAAT-box	CAAT	1289	+
Csa1G042910.1	CAAT-box	CAAT	1384	+
Csa1G042910.1	CAAT-box	CAAT	1414	+
Csa1G042910.1	CAAT-box	CAAAT	1416	-	common cis-acting element in promoter and enhancer regions
Csa1G042910.1	CAAT-box	CAAT	1438	+
Csa1G042910.1	CAAT-box	CAAT	1458	-
Csa1G042910.1	CAAT-box	CAAT	1474	-
Csa1G042910.1	CAAT-box	CAAT	1548	+
Csa1G042910.1	CAAT-box	CAAAT	1616	+	common cis-acting element in promoter and enhancer regions
Csa1G042910.1	CAAT-box	CAAT	1632	+
Csa1G042910.1	CAAT-box	CAAAT	1655	-	common cis-acting element in promoter and enhancer regions
Csa1G042910.1	CAAT-box	CCAAT	1665	+	common cis-acting element in promoter and enhancer regions
Csa1G042910.1	CAAT-box	CAAT	1666	+
Csa1G042910.1	CAAT-box	CCAAT	1807	+	common cis-acting element in promoter and enhancer regions
Csa1G042910.1	CAAT-box	CAAT	1808	+
Csa1G042910.1	CAAT-box	CCAAT	1855	+	common cis-acting element in promoter and enhancer regions
Csa1G042910.1	CAAT-box	CAAT	1856	+
Csa1G042910.1	CAAT-box	CAAAT	1863	-	common cis-acting element in promoter and enhancer regions
Csa1G042910.1	CAAT-box	CAAT	1955	+
Csa1G042910.1	CAAT-box	CAAAT	1979	+	common cis-acting element in promoter and enhancer regions
Csa1G042910.1	CAT-box	GCCACT	1297	-	cis-acting regulatory element related to meristem expression
Csa1G042910.1	CAT-box	GCCACT	1964	+	cis-acting regulatory element related to meristem expression
Csa1G042910.1	TCA	TCATCTTCAT	778	+
Csa1G042910.1	Unnamed__4	CTCC	255	-
Csa1G042910.1	Unnamed__4	CTCC	288	+
Csa1G042910.1	Unnamed__4	CTCC	573	-
Csa1G042910.1	Unnamed__4	CTCC	1040	-
Csa1G042910.1	Unnamed__4	CTCC	1078	-
Csa1G042910.1	Unnamed__4	CTCC	1224	+
Csa1G042910.1	Unnamed__4	CTCC	1663	+
Csa1G042910.1	Unnamed__4	CTCC	1825	-
Csa1G042910.1	Unnamed__4	CTCC	1888	+
Csa1G042910.1	Unnamed__4	CTCC	1903	+
Csa1G042910.1	Unnamed__4	CTCC	1936	+
Csa1G042910.1	AuxRE	TGTCTCAATAAG	1284	+	part of an auxin-responsive element
Csa1G042910.1	MYB	CAACCA	652	+
Csa1G042910.1	MYB	CAACCA	761	-
Csa1G042910.1	TCT-motif	TCTTAC	1252	-	part of a light responsive element
Csa1G042910.1	TCT-motif	TCTTAC	1704	-	part of a light responsive element
Csa1G042910.1	TCT-motif	TCTTAC	1926	+	part of a light responsive element
Csa1G042910.1	TGACG-motif	TGACG	413	-	cis-acting regulatory element involved in the MeJA-responsiveness
Csa1G042910.1	G-Box	CACGTT	951	+	cis-acting regulatory element involved in light responsiveness
Csa1G042910.1	MRE	AACCTAA	1392	-	MYB binding site involved in light responsiveness
Csa1G042910.1	ERE	ATTTTAAA	1516	-
Csa1G042910.1	Myb	TAACTG	668	-
Csa1G042910.1	Myc	TCTCTTA	1253	-
Csa1G042910.1	WRE3	CCACCT	1175	+
Csa1G042910.1	CCGTCC motif	CCGTCC	461	-
Csa1G042910.1	AAGAA-motif	GAAAGAA	633	-
Csa1G042910.1	AAGAA-motif	GAAAGAA	773	-
Csa1G042910.1	AAGAA-motif	gGTAAAGAAA	1304	-
Csa1G042910.1	AAGAA-motif	gGTAAAGAAA	1323	-
Csa1G042910.1	MYC	CATGTG	149	-
Csa1G042910.1	MYC	CAATTG	798	+
Csa1G042910.1	MYC	CATTTG	918	+
Csa1G042910.1	WUN-motif	AAATTACT	1218	+
Csa1G042910.1	WUN-motif	AAATTTCCT	1528	+	wound-responsive element
Csa1G042910.1	O2-site	GATGACATGG	344	+	cis-acting regulatory element involved in zein metabolism regulation
Csa1G097710.1	AT~TATA-box	TATATA	1630	-
Csa1G097710.1	CAAT-box	CAAT	19	-
Csa1G097710.1	CAAT-box	CAAAT	60	-	common cis-acting element in promoter and enhancer regions
Csa1G097710.1	CAAT-box	CAAT	114	-
Csa1G097710.1	CAAT-box	CAAT	128	-
Csa1G097710.1	CAAT-box	CCAAT	139	+	common cis-acting element in promoter and enhancer regions
Csa1G097710.1	CAAT-box	CAAT	140	+
Csa1G097710.1	CAAT-box	CAAT	147	-
Csa1G097710.1	CAAT-box	CAAAT	154	-	common cis-acting element in promoter and enhancer regions
Csa1G097710.1	CAAT-box	CAAT	468	-
Csa1G097710.1	CAAT-box	CAAT	481	-
Csa1G097710.1	CAAT-box	CAAAT	528	-	common cis-acting element in promoter and enhancer regions
Csa1G097710.1	CAAT-box	CAAT	630	-
Csa1G097710.1	CAAT-box	CAAAT	696	-	common cis-acting element in promoter and enhancer regions
Csa1G097710.1	CAAT-box	CAAT	868	+
Csa1G097710.1	CAAT-box	CAAT	1143	+
Csa1G097710.1	CAAT-box	CAAT	1195	-
Csa1G097710.1	CAAT-box	CAAT	1206	-
Csa1G097710.1	CAAT-box	CAAAT	1220	-	common cis-acting element in promoter and enhancer regions
Csa1G097710.1	CAAT-box	CAAAT	1390	+	common cis-acting element in promoter and enhancer regions
Csa1G097710.1	CAAT-box	CAAT	1395	+
Csa1G097710.1	CAAT-box	CAAT	1437	+
Csa1G097710.1	CAAT-box	CAAT	1446	+
Csa1G097710.1	CAAT-box	CAAAT	1448	-	common cis-acting element in promoter and enhancer regions
Csa1G097710.1	CAAT-box	CAAT	1523	-
Csa1G097710.1	CAAT-box	CAAT	1578	-
Csa1G097710.1	CAAT-box	CAAAT	1678	+	common cis-acting element in promoter and enhancer regions
Csa1G097710.1	CAAT-box	CAAT	1705	-
Csa1G097710.1	CAAT-box	CAAT	1711	+
Csa1G097710.1	CAAT-box	CAAT	1726	-
Csa1G097710.1	CAAT-box	CAAT	1746	-
Csa1G097710.1	CAAT-box	CAAT	1751	+
Csa1G097710.1	CAAT-box	CAAT	1770	-
Csa1G097710.1	CAAT-box	CCAAT	1927	-	common cis-acting element in promoter and enhancer regions
Csa1G097710.1	CAAT-box	CCAAT	1946	+	common cis-acting element in promoter and enhancer regions
Csa1G097710.1	CAAT-box	CAAT	1947	+
Csa1G097710.1	CAAT-box	CCAAT	1988	-	common cis-acting element in promoter and enhancer regions
Csa1G097710.1	CAAT-box	CAAT	1996	+
Csa1G097710.1	STRE	AGGGG	636	+
Csa1G097710.1	STRE	AGGGG	835	-
Csa1G097710.1	STRE	AGGGG	1236	+
Csa1G097710.1	TATA-box	TATA	245	+	core promoter element around -30 of transcription start
Csa1G097710.1	TATA-box	TATAAATA	314	-	core promoter element around -30 of transcription start
Csa1G097710.1	TATA-box	TATAAAT	315	-	core promoter element around -30 of transcription start
Csa1G097710.1	TATA-box	TATAAA	316	-	core promoter element around -30 of transcription start
Csa1G097710.1	TATA-box	TATAA	317	-	core promoter element around -30 of transcription start
Csa1G097710.1	TATA-box	TATA	318	+	core promoter element around -30 of transcription start
Csa1G097710.1	TATA-box	TATAAA	338	-	core promoter element around -30 of transcription start
Csa1G097710.1	TATA-box	TATAA	339	-	core promoter element around -30 of transcription start
Csa1G097710.1	TATA-box	TATA	340	+	core promoter element around -30 of transcription start
Csa1G097710.1	TATA-box	TATA	541	+	core promoter element around -30 of transcription start
Csa1G097710.1	TATA-box	TACAAAA	608	-	core promoter element around -30 of transcription start
Csa1G097710.1	TATA-box	taTATAAAtc	1418	+	core promoter element around -30 of transcription start
Csa1G097710.1	TATA-box	TATA	1476	-	core promoter element around -30 of transcription start
Csa1G097710.1	TATA-box	TACAAAA	1567	-	core promoter element around -30 of transcription start
Csa1G097710.1	TATA-box	ATATAT	1629	-	core promoter element around -30 of transcription start
Csa1G097710.1	TATA-box	TATATA	1630	-	core promoter element around -30 of transcription start
Csa1G097710.1	TATA-box	ATATAT	1631	-	core promoter element around -30 of transcription start
Csa1G097710.1	TATA-box	TATA	1632	-	core promoter element around -30 of transcription start
Csa1G097710.1	TATA-box	ATTATA	1877	+	core promoter element around -30 of transcription start
Csa1G097710.1	TATA-box	TATAA	1878	-	core promoter element around -30 of transcription start
Csa1G097710.1	TATA-box	TATA	1879	-	core promoter element around -30 of transcription start
Csa1G097710.1	TATA-box	TATAAA	1884	-	core promoter element around -30 of transcription start
Csa1G097710.1	TATA-box	TATAA	1885	-	core promoter element around -30 of transcription start
Csa1G097710.1	TATA-box	TATA	1886	-	core promoter element around -30 of transcription start
Csa1G097710.1	TATA	TATAAAAT	541	+
Csa1G097710.1	TATC-box	TATCCCA	1929	-	cis-acting element involved in gibberellin-responsiveness
Csa1G097710.1	Unnamed__2	AACCTAACCT	841	+
Csa1G097710.1	Unnamed__6	taTAAATATct	311	-
Csa1G097710.1	ABRE	AACCCGG	1027	-	cis-acting element involved in the abscisic acid responsiveness
Csa1G097710.1	ABRE	ACGTG	1691	-	cis-acting element involved in the abscisic acid responsiveness
Csa1G097710.1	GATA-motif	AAGATAAGATT	498	+	part of a light responsive element
Csa1G097710.1	GATA-motif	AAGGATAAGG	1155	-	part of a light responsive element
Csa1G097710.1	TGA-element	AACGAC	722	+	auxin-responsive element
Csa1G097710.1	W box	TTGACC	812	-
Csa1G097710.1		motif_sequence	346	-	short_function
Csa1G097710.1		motif_sequence	612	-	short_function
Csa1G097710.1		motif_sequence	649	-	short_function
Csa1G097710.1		motif_sequence	672	+	short_function
Csa1G097710.1		motif_sequence	1004	+	short_function
Csa1G097710.1		motif_sequence	1169	+	short_function
Csa1G097710.1		motif_sequence	1182	+	short_function
Csa1G097710.1		motif_sequence	1254	+	short_function
Csa1G097710.1		motif_sequence	1796	+	short_function
Csa1G097710.1		motif_sequence	1895	-	short_function
Csa1G097710.1		motif_sequence	1914	-	short_function
Csa1G097710.1		motif_sequence	1919	-	short_function
Csa1G097710.1	AC-II	CCACCAACCCCC	1345	-
Csa1G097710.1	Y-box	TGTGGAGGAGCA	1936	+	?
Csa1G097710.1	ARE	AAACCA	392	-	cis-acting regulatory element essential for the anaerobic induction
Csa1G097710.1	Box 4	ATTAAT	323	+	part of a conserved DNA module involved in light responsiveness
Csa1G097710.1	Box 4	ATTAAT	327	+	part of a conserved DNA module involved in light responsiveness
Csa1G097710.1	Box 4	ATTAAT	1019	-	part of a conserved DNA module involved in light responsiveness
Csa1G097710.1	GT1-motif	GGTTAA	839	-	light responsive element
Csa1G097710.1	AAGAA-motif	gGTAAAGAAA	41	+
Csa1G097710.1	AAGAA-motif	GAAAGAA	745	+
Csa1G097710.1	AAGAA-motif	GAAAGAA	917	-
Csa1G097710.1	AAGAA-motif	GAAAGAA	962	-
Csa1G097710.1	AAGAA-motif	gGTAAAGAAA	994	-
Csa1G097710.1	MYC	CATGTG	220	+
Csa1G097710.1	ERE	ATTTTAAA	169	-
Csa1G097710.1	ERE	ATTTTAAA	262	-
Csa1G097710.1	G-Box	CACGTT	1691	+	cis-acting regulatory element involved in light responsiveness
Csa1G097710.1	TCA-element	TCAGAAGAGG	1911	+	cis-acting element involved in salicylic acid responsiveness
Csa1G097710.1	F-box	CTATTCTCATT	1187	+
Csa1G097710.1	Unnamed__4	CTCC	192	-
Csa1G097710.1	Unnamed__4	CTCC	371	-
Csa1G097710.1	Unnamed__4	CTCC	537	-
Csa1G097710.1	Unnamed__4	CTCC	649	-
Csa1G097710.1	Unnamed__4	CTCC	754	-
Csa1G097710.1	Unnamed__4	CTCC	801	-
Csa1G097710.1	Unnamed__4	CTCC	1375	+
Csa1G097710.1	Unnamed__4	CTCC	1939	-
Csa1G097710.1	Unnamed__4	CTCC	1942	-
Csa1G407190.1	TCT-motif	TCTTAC	329	-	part of a light responsive element
Csa1G407190.1	TCT-motif	TCTTAC	863	+	part of a light responsive element
Csa1G407190.1	RY-element	CATGCATG	1162	-	cis-acting regulatory element involved in seed-specific regulation
Csa1G407190.1	MYB	TAACCA	497	-
Csa1G407190.1	MYB	CAACCA	1027	+
Csa1G407190.1	MYB	CAACCA	1839	-
Csa1G407190.1	G-Box	CACGTG	674	+	cis-acting regulatory element involved in light responsiveness
Csa1G407190.1	MYB-like sequence	TAACCA	497	-
Csa1G407190.1	TCA	TCATCTTCAT	574	-
Csa1G407190.1	Unnamed__4	CTCC	22	+
Csa1G407190.1	Unnamed__4	CTCC	108	+
Csa1G407190.1	Unnamed__4	CTCC	818	+
Csa1G407190.1	Unnamed__4	CTCC	845	+
Csa1G407190.1	Unnamed__4	CTCC	1359	-
Csa1G407190.1	Unnamed__4	CTCC	1414	+
Csa1G407190.1	Unnamed__4	CTCC	1667	-
Csa1G407190.1	WUN-motif	TAATTACTC	1743	+
Csa1G407190.1	AAGAA-motif	GAAAGAA	287	-
Csa1G407190.1	AAGAA-motif	GAAAGAA	591	+
Csa1G407190.1	MYC	CAATTG	437	+
Csa1G407190.1	MYC	CATTTG	1971	-
Csa1G407190.1	W box	TTGACC	1486	-
Csa1G407190.1	W box	TTGACC	1643	-
Csa1G407190.1		motif_sequence	212	-	short_function
Csa1G407190.1		motif_sequence	576	-	short_function
Csa1G407190.1		motif_sequence	734	-	short_function
Csa1G407190.1		motif_sequence	793	+	short_function
Csa1G407190.1		motif_sequence	1124	-	short_function
Csa1G407190.1		motif_sequence	1188	-	short_function
Csa1G407190.1		motif_sequence	1405	-	short_function
Csa1G407190.1		motif_sequence	1412	+	short_function
Csa1G407190.1		motif_sequence	1427	+	short_function
Csa1G407190.1		motif_sequence	1594	+	short_function
Csa1G407190.1		motif_sequence	1749	+	short_function
Csa1G407190.1	ABRE	ACGTG	668	+	cis-acting element involved in the abscisic acid responsiveness
Csa1G407190.1	ABRE	CACGTG	674	+	cis-acting element involved in the abscisic acid responsiveness
Csa1G407190.1	ABRE	ACGTG	675	+	cis-acting element involved in the abscisic acid responsiveness
Csa1G407190.1	Box 4	ATTAAT	294	+	part of a conserved DNA module involved in light responsiveness
Csa1G407190.1	Box 4	ATTAAT	344	+	part of a conserved DNA module involved in light responsiveness
Csa1G407190.1	Box 4	ATTAAT	350	+	part of a conserved DNA module involved in light responsiveness
Csa1G407190.1	Box 4	ATTAAT	421	+	part of a conserved DNA module involved in light responsiveness
Csa1G407190.1	Box 4	ATTAAT	1105	-	part of a conserved DNA module involved in light responsiveness
Csa1G407190.1	Box 4	ATTAAT	1236	-	part of a conserved DNA module involved in light responsiveness
Csa1G407190.1	Box 4	ATTAAT	1327	-	part of a conserved DNA module involved in light responsiveness
Csa1G407190.1	Box 4	ATTAAT	1741	-	part of a conserved DNA module involved in light responsiveness
Csa1G407190.1	ACE	CTAACGTATT	631	-	cis-acting element involved in light responsiveness
Csa1G407190.1	ACE	GACACGTATG	665	-	cis-acting element involved in light responsiveness
Csa1G407190.1	ACE	CTAACGTATT	981	+	cis-acting element involved in light responsiveness
Csa1G407190.1	ABRE3a	TACGTG	667	+
Csa1G407190.1	ABRE4	CACGTA	667	-
Csa1G407190.1	ARE	AAACCA	1618	+	cis-acting regulatory element essential for the anaerobic induction
Csa1G407190.1	TATA-box	TACAAAA	37	-	core promoter element around -30 of transcription start
Csa1G407190.1	TATA-box	TATA	59	+	core promoter element around -30 of transcription start
Csa1G407190.1	TATA-box	ATATAT	137	+	core promoter element around -30 of transcription start
Csa1G407190.1	TATA-box	TATA	138	+	core promoter element around -30 of transcription start
Csa1G407190.1	TATA-box	TATA	234	+	core promoter element around -30 of transcription start
Csa1G407190.1	TATA-box	TACAAAA	300	-	core promoter element around -30 of transcription start
Csa1G407190.1	TATA-box	TATACA	303	-	core promoter element around -30 of transcription start
Csa1G407190.1	TATA-box	TATA	305	+	core promoter element around -30 of transcription start
Csa1G407190.1	TATA-box	ATATAT	381	+	core promoter element around -30 of transcription start
Csa1G407190.1	TATA-box	TATATTTATATTT	382	+	core promoter element around -30 of transcription start
Csa1G407190.1	TATA-box	TATAAATA	384	-	core promoter element around -30 of transcription start
Csa1G407190.1	TATA-box	TATAAAT	385	-	core promoter element around -30 of transcription start
Csa1G407190.1	TATA-box	TATAAA	386	-	core promoter element around -30 of transcription start
Csa1G407190.1	TATA-box	TATAA	387	-	core promoter element around -30 of transcription start
Csa1G407190.1	TATA-box	TATA	388	+	core promoter element around -30 of transcription start
Csa1G407190.1	TATA-box	TATA	694	+	core promoter element around -30 of transcription start
Csa1G407190.1	TATA-box	ATATAA	949	+	core promoter element around -30 of transcription start
Csa1G407190.1	TATA-box	TATA	950	+	core promoter element around -30 of transcription start
Csa1G407190.1	TATA-box	TATA	1007	+	core promoter element around -30 of transcription start
Csa1G407190.1	TATA-box	TACAAAA	1053	-	core promoter element around -30 of transcription start
Csa1G407190.1	TATA-box	ATTATA	1222	+	core promoter element around -30 of transcription start
Csa1G407190.1	TATA-box	TATAA	1223	-	core promoter element around -30 of transcription start
Csa1G407190.1	TATA-box	TATA	1224	-	core promoter element around -30 of transcription start
Csa1G407190.1	TATA-box	TATA	1249	-	core promoter element around -30 of transcription start
Csa1G407190.1	TATA-box	TATAAAA	1261	-	core promoter element around -30 of transcription start
Csa1G407190.1	TATA-box	TATAAA	1262	-	core promoter element around -30 of transcription start
Csa1G407190.1	TATA-box	TATAA	1263	-	core promoter element around -30 of transcription start
Csa1G407190.1	TATA-box	TATA	1264	-	core promoter element around -30 of transcription start
Csa1G407190.1	TATA-box	ATTATA	1271	+	core promoter element around -30 of transcription start
Csa1G407190.1	TATA-box	TATATAA	1272	-	core promoter element around -30 of transcription start
Csa1G407190.1	TATA-box	TATATA	1273	-	core promoter element around -30 of transcription start
Csa1G407190.1	TATA-box	ATATAT	1274	-	core promoter element around -30 of transcription start
Csa1G407190.1	TATA-box	TATATA	1275	-	core promoter element around -30 of transcription start
Csa1G407190.1	TATA-box	ATATAT	1276	-	core promoter element around -30 of transcription start
Csa1G407190.1	TATA-box	TATATA	1277	-	core promoter element around -30 of transcription start
Csa1G407190.1	TATA-box	ATATAT	1278	-	core promoter element around -30 of transcription start
Csa1G407190.1	TATA-box	TATA	1279	-	core promoter element around -30 of transcription start
Csa1G407190.1	TATA-box	TATAAGAA	1519	-	core promoter element around -30 of transcription start
Csa1G407190.1	TATA-box	TATATAA	1522	-	core promoter element around -30 of transcription start
Csa1G407190.1	TATA-box	TATATA	1523	-	core promoter element around -30 of transcription start
Csa1G407190.1	TATA-box	TATA	1525	-	core promoter element around -30 of transcription start
Csa1G407190.1	TATA-box	ATATAT	1534	-	core promoter element around -30 of transcription start
Csa1G407190.1	TATA-box	TATATA	1535	-	core promoter element around -30 of transcription start
Csa1G407190.1	TATA-box	ATATAT	1536	-	core promoter element around -30 of transcription start
Csa1G407190.1	TATA-box	TATA	1537	-	core promoter element around -30 of transcription start
Csa1G407190.1	TATA-box	TATATA	1547	-	core promoter element around -30 of transcription start
Csa1G407190.1	TATA-box	ATATAA	1548	+	core promoter element around -30 of transcription start
Csa1G407190.1	TATA-box	TATA	1549	-	core promoter element around -30 of transcription start
Csa1G407190.1	TATA-box	TATAAA	1949	-	core promoter element around -30 of transcription start
Csa1G407190.1	TATA-box	TATAA	1950	-	core promoter element around -30 of transcription start
Csa1G407190.1	TATA-box	TATA	1951	-	core promoter element around -30 of transcription start
Csa1G407190.1	TATA-box	TATAAA	1993	-	core promoter element around -30 of transcription start
Csa1G407190.1	TATA-box	TATAA	1994	-	core promoter element around -30 of transcription start
Csa1G407190.1	TATA-box	TATA	1995	-	core promoter element around -30 of transcription start
Csa1G407190.1	AE-box	AGAAACAA	652	+	part of a module for light response
Csa1G407190.1	AE-box	AGAAACTT	1887	+	part of a module for light response
Csa1G407190.1	AT~TATA-box	TATATA	1273	-
Csa1G407190.1	AT~TATA-box	TATATA	1275	-
Csa1G407190.1	AT~TATA-box	TATATA	1277	-
Csa1G407190.1	AT~TATA-box	TATATA	1523	-
Csa1G407190.1	AT~TATA-box	TATATA	1535	-
Csa1G407190.1	AT~TATA-box	TATATA	1547	-
Csa1G407190.1	CAAT-box	CAAT	88	+
Csa1G407190.1	CAAT-box	CAAAT	151	-	common cis-acting element in promoter and enhancer regions
Csa1G407190.1	CAAT-box	CAAT	167	+
Csa1G407190.1	CAAT-box	CAAAT	169	-	common cis-acting element in promoter and enhancer regions
Csa1G407190.1	CAAT-box	CAAT	216	-
Csa1G407190.1	CAAT-box	CAAAT	222	-	common cis-acting element in promoter and enhancer regions
Csa1G407190.1	CAAT-box	CAAT	238	-
Csa1G407190.1	CAAT-box	CAAAT	251	-	common cis-acting element in promoter and enhancer regions
Csa1G407190.1	CAAT-box	CAAT	260	-
Csa1G407190.1	CAAT-box	CAAT	269	-
Csa1G407190.1	CAAT-box	CAAAT	354	-	common cis-acting element in promoter and enhancer regions
Csa1G407190.1	CAAT-box	CAAT	371	-
Csa1G407190.1	CAAT-box	CAAT	391	-
Csa1G407190.1	CAAT-box	CAAAT	409	+	common cis-acting element in promoter and enhancer regions
Csa1G407190.1	CAAT-box	CAAT	417	-
Csa1G407190.1	CAAT-box	CAAT	437	+
Csa1G407190.1	CAAT-box	CAAT	439	-
Csa1G407190.1	CAAT-box	CAAAT	757	+	common cis-acting element in promoter and enhancer regions
Csa1G407190.1	CAAT-box	CAAAT	851	+	common cis-acting element in promoter and enhancer regions
Csa1G407190.1	CAAT-box	CAAT	858	+
Csa1G407190.1	CAAT-box	CAAT	938	+
Csa1G407190.1	CAAT-box	CAAAT	957	-	common cis-acting element in promoter and enhancer regions
Csa1G407190.1	CAAT-box	CAAT	998	+
Csa1G407190.1	CAAT-box	CCAAT	1030	+	common cis-acting element in promoter and enhancer regions
Csa1G407190.1	CAAT-box	CAAT	1031	+
Csa1G407190.1	CAAT-box	CAAAT	1252	-	common cis-acting element in promoter and enhancer regions
Csa1G407190.1	CAAT-box	TGCCAAC	1372	-	common cis-acting element in promoter and enhancer regions
Csa1G407190.1	CAAT-box	CAAT	1516	+
Csa1G407190.1	CAAT-box	CAAAT	1579	-	common cis-acting element in promoter and enhancer regions
Csa1G407190.1	CAAT-box	CAAT	1590	-
Csa1G407190.1	CAAT-box	CAAT	1791	-
Csa1G407190.1	CAAT-box	CAAAT	1971	+	common cis-acting element in promoter and enhancer regions
Csa1G407190.1	CAAT-box	CAAT	1999	-
Csa1G407190.1	CAAT-box	CAAT	2003	-
Csa1G407190.1	STRE	AGGGG	1574	+
Csa1G407190.1	Unnamed__1	CGTGG	93	-
Csa1G407190.1	Unnamed__6	taTAAATATct	381	-
Csa1G407190.1	G-box	TACGTG	667	+	cis-acting regulatory element involved in light responsiveness
Csa1G407190.1	G-box	ACACGTG(G/t)CACC	669	-	cis-acting regulatory element involved in light responsiveness
Csa1G407190.1	G-box	ACACGTGT	673	+	cis-acting regulatory element involved in light responsiveness
Csa1G407190.1	G-box	CACGTG	674	+	cis-acting regulatory element involved in light responsiveness
Csa2G005890.1	Unnamed__4	CTCC	148	-
Csa2G005890.1	Unnamed__4	CTCC	240	-
Csa2G005890.1	Unnamed__4	CTCC	1044	+
Csa2G005890.1	Unnamed__4	CTCC	1637	-
Csa2G005890.1	Unnamed__4	CTCC	1735	+
Csa2G005890.1	Unnamed__4	CTCC	1991	-
Csa2G005890.1	Unnamed__4	CTCC	2012	+
Csa2G005890.1	MYB-like sequence	TAACCA	745	-
Csa2G005890.1	MYB-like sequence	TAACCA	798	-
Csa2G005890.1	TC-rich repeats	ATTCTCTAAC	179	-	cis-acting element involved in defense and stress responsiveness
Csa2G005890.1	MRE	AACCTAA	1055	-	MYB binding site involved in light responsiveness
Csa2G005890.1	G-Box	CACGTT	163	+	cis-acting regulatory element involved in light responsiveness
Csa2G005890.1	Myb	CAACTG	533	+
Csa2G005890.1	Sp1	GGGCGG	884	-	light responsive element
Csa2G005890.1	MYB	TAACCA	745	-
Csa2G005890.1	MYB	TAACCA	798	-
Csa2G005890.1	TGACG-motif	TGACG	1016	-	cis-acting regulatory element involved in the MeJA-responsiveness
Csa2G005890.1	TCT-motif	TCTTAC	85	+	part of a light responsive element
Csa2G005890.1	TCT-motif	TCTTAC	1274	+	part of a light responsive element
Csa2G005890.1	AAGAA-motif	GAAAGAA	58	+
Csa2G005890.1	AAGAA-motif	GAAAGAA	276	-
Csa2G005890.1	MYC	CATTTG	451	-
Csa2G005890.1	MYC	CAATTG	480	+
Csa2G005890.1	MYC	CAATTG	953	+
Csa2G005890.1	MYC	CATTTG	1087	-
Csa2G005890.1	MYC	CATTTG	1555	+
Csa2G005890.1	Myc	TCTCTTA	1249	+
Csa2G005890.1	WRE3	CCACCT	351	+
Csa2G005890.1	WUN-motif	AAATTTCTT	1207	-
Csa2G005890.1	3-AF1 binding site	TAAGAGAGGAA	1245	-	light responsive element
Csa2G005890.1	ATCT-motif	AATCTAATCC	1190	-	part of a conserved DNA module involved in light responsiveness
Csa2G005890.1	ARE	AAACCA	443	+	cis-acting regulatory element essential for the anaerobic induction
Csa2G005890.1	ARE	AAACCA	1922	+	cis-acting regulatory element essential for the anaerobic induction
Csa2G005890.1	AuxRR-core	GGTCCAT	670	-	cis-acting regulatory element involved in auxin responsiveness
Csa2G005890.1	MBS	CAACTG	533	+	MYB binding site involved in drought-inducibility
Csa2G005890.1	HD-Zip 1	CAAT(A/T)ATTG	197	+	element involved in differentiation of the palisade mesophyll cells
Csa2G005890.1	GT1-motif	GGTTAA	799	+	light responsive element
Csa2G005890.1	GA-motif	ATAGATAA	1138	-	part of a light responsive element
Csa2G005890.1	CGTCA-motif	CGTCA	1016	+	cis-acting regulatory element involved in the MeJA-responsiveness
Csa2G005890.1	Box 4	ATTAAT	231	+	part of a conserved DNA module involved in light responsiveness
Csa2G005890.1	Box 4	ATTAAT	695	+	part of a conserved DNA module involved in light responsiveness
Csa2G005890.1	Box 4	ATTAAT	1841	-	part of a conserved DNA module involved in light responsiveness
Csa2G005890.1	ABRE	ACGTG	163	-	cis-acting element involved in the abscisic acid responsiveness
Csa2G005890.1		motif_sequence	346	+	short_function
Csa2G005890.1		motif_sequence	656	-	short_function
Csa2G005890.1		motif_sequence	765	-	short_function
Csa2G005890.1		motif_sequence	1065	-	short_function
Csa2G005890.1		motif_sequence	1474	+	short_function
Csa2G005890.1		motif_sequence	1695	+	short_function
Csa2G005890.1		motif_sequence	1760	+	short_function
Csa2G005890.1		motif_sequence	1768	+	short_function
Csa2G005890.1		motif_sequence	1847	-	short_function
Csa2G005890.1		motif_sequence	2006	+	short_function
Csa2G005890.1	TGA-element	AACGAC	1809	+	auxin-responsive element
Csa2G005890.1	DRE core	GCCGAC	550	-
Csa2G005890.1	as-1	TGACG	1016	-
Csa2G005890.1	Unnamed__1	CGTGG	976	-
Csa2G005890.1	Unnamed__1	GAATTTAATTAA	1167	+	60K protein binding site
Csa2G005890.1	Unnamed__1	CGTGG	1632	-
Csa2G005890.1	STRE	AGGGG	898	+
Csa2G005890.1	CAAT-box	CAAT	197	+
Csa2G005890.1	CAAT-box	CAAT	202	-
Csa2G005890.1	CAAT-box	CAAT	265	+
Csa2G005890.1	CAAT-box	CAAAT	324	-	common cis-acting element in promoter and enhancer regions
Csa2G005890.1	CAAT-box	CAAT	341	-
Csa2G005890.1	CAAT-box	CAAT	398	+
Csa2G005890.1	CAAT-box	CAAT	402	+
Csa2G005890.1	CAAT-box	CAAAT	451	+	common cis-acting element in promoter and enhancer regions
Csa2G005890.1	CAAT-box	CAAT	480	+
Csa2G005890.1	CAAT-box	CAAT	482	-
Csa2G005890.1	CAAT-box	CAAT	577	+
Csa2G005890.1	CAAT-box	CAAAT	603	+	common cis-acting element in promoter and enhancer regions
Csa2G005890.1	CAAT-box	CCAAT	611	+	common cis-acting element in promoter and enhancer regions
Csa2G005890.1	CAAT-box	CAAT	612	+
Csa2G005890.1	CAAT-box	CAAT	620	-
Csa2G005890.1	CAAT-box	CCAAT	675	+	common cis-acting element in promoter and enhancer regions
Csa2G005890.1	CAAT-box	CAAT	676	+
Csa2G005890.1	CAAT-box	CAAT	769	-
Csa2G005890.1	CAAT-box	CCCAATTT	778	-	common cis-acting element in promoter and enhancer regions
Csa2G005890.1	CAAT-box	CCAAT	780	-	common cis-acting element in promoter and enhancer regions
Csa2G005890.1	CAAT-box	CAAAT	830	+	common cis-acting element in promoter and enhancer regions
Csa2G005890.1	CAAT-box	CAAAT	847	+	common cis-acting element in promoter and enhancer regions
Csa2G005890.1	CAAT-box	CAAAT	947	-	common cis-acting element in promoter and enhancer regions
Csa2G005890.1	CAAT-box	CCAAT	952	+	common cis-acting element in promoter and enhancer regions
Csa2G005890.1	CAAT-box	CAAT	953	+
Csa2G005890.1	CAAT-box	CAAT	955	-
Csa2G005890.1	CAAT-box	CAAAT	1087	+	common cis-acting element in promoter and enhancer regions
Csa2G005890.1	CAAT-box	CAAT	1116	+
Csa2G005890.1	CAAT-box	CAAT	1155	-
Csa2G005890.1	CAAT-box	CAAAT	1287	+	common cis-acting element in promoter and enhancer regions
Csa2G005890.1	CAAT-box	CAAAT	1332	+	common cis-acting element in promoter and enhancer regions
Csa2G005890.1	CAAT-box	CAAT	1344	+
Csa2G005890.1	CAAT-box	CAAT	1359	+
Csa2G005890.1	CAAT-box	CAAAT	1396	+	common cis-acting element in promoter and enhancer regions
Csa2G005890.1	CAAT-box	CAAT	1406	-
Csa2G005890.1	CAAT-box	CAAAT	1463	-	common cis-acting element in promoter and enhancer regions
Csa2G005890.1	CAAT-box	CAAT	1545	+
Csa2G005890.1	CAAT-box	CAAAT	1556	-	common cis-acting element in promoter and enhancer regions
Csa2G005890.1	CAAT-box	CCAAT	1587	+	common cis-acting element in promoter and enhancer regions
Csa2G005890.1	CAAT-box	CAAT	1588	+
Csa2G005890.1	CAAT-box	CAAT	1658	+
Csa2G005890.1	CAAT-box	CAAT	1687	-
Csa2G005890.1	CAAT-box	CAAT	1874	+
Csa2G005890.1	CAAT-box	CCAAT	1944	+	common cis-acting element in promoter and enhancer regions
Csa2G005890.1	CAAT-box	CAAT	1945	+
Csa2G005890.1	AT~TATA-box	TATATA	65	+
Csa2G005890.1	AT~TATA-box	TATATA	211	+
Csa2G005890.1	TATA	TATAAAAT	67	+
Csa2G005890.1	TATA	TATAAAAT	412	+
Csa2G005890.1	TATA-box	ATATAT	64	+	core promoter element around -30 of transcription start
Csa2G005890.1	TATA-box	TATATA	65	+	core promoter element around -30 of transcription start
Csa2G005890.1	TATA-box	ATATAA	66	+	core promoter element around -30 of transcription start
Csa2G005890.1	TATA-box	TATA	67	+	core promoter element around -30 of transcription start
Csa2G005890.1	TATA-box	TATAAAT	130	-	core promoter element around -30 of transcription start
Csa2G005890.1	TATA-box	TATAAA	131	-	core promoter element around -30 of transcription start
Csa2G005890.1	TATA-box	TATAA	132	-	core promoter element around -30 of transcription start
Csa2G005890.1	TATA-box	TATA	133	+	core promoter element around -30 of transcription start
Csa2G005890.1	TATA-box	ATATAT	210	+	core promoter element around -30 of transcription start
Csa2G005890.1	TATA-box	TATATA	211	+	core promoter element around -30 of transcription start
Csa2G005890.1	TATA-box	ATATAA	212	+	core promoter element around -30 of transcription start
Csa2G005890.1	TATA-box	TATA	213	+	core promoter element around -30 of transcription start
Csa2G005890.1	TATA-box	ATATAA	411	+	core promoter element around -30 of transcription start
Csa2G005890.1	TATA-box	TATA	412	+	core promoter element around -30 of transcription start
Csa2G005890.1	TATA-box	TATA	475	+	core promoter element around -30 of transcription start
Csa2G005890.1	TATA-box	ATATAA	486	+	core promoter element around -30 of transcription start
Csa2G005890.1	TATA-box	TATA	487	+	core promoter element around -30 of transcription start
Csa2G005890.1	TATA-box	TATA	904	+	core promoter element around -30 of transcription start
Csa2G005890.1	TATA-box	TATA	1122	-	core promoter element around -30 of transcription start
Csa2G005890.1	TATA-box	ATTATA	1262	+	core promoter element around -30 of transcription start
Csa2G005890.1	TATA-box	TATAA	1263	-	core promoter element around -30 of transcription start
Csa2G005890.1	TATA-box	TATA	1264	-	core promoter element around -30 of transcription start
Csa2G005890.1	TATA-box	TACAAAA	1266	+	core promoter element around -30 of transcription start
Csa2G005890.1	TATA-box	ATATAA	1335	+	core promoter element around -30 of transcription start
Csa2G005890.1	TATA-box	TATA	1336	-	core promoter element around -30 of transcription start
Csa2G005890.1	TATA-box	ATTATA	1361	+	core promoter element around -30 of transcription start
Csa2G005890.1	TATA-box	TATAA	1362	-	core promoter element around -30 of transcription start
Csa2G005890.1	TATA-box	TATA	1363	-	core promoter element around -30 of transcription start
Csa2G005890.1	TATA-box	TACAAAA	1365	+	core promoter element around -30 of transcription start
Csa2G005890.1	TATA-box	TATAA	1683	-	core promoter element around -30 of transcription start
Csa2G005890.1	TATA-box	TATA	1684	-	core promoter element around -30 of transcription start
Csa2G005890.1	TATA-box	ATTATA	1999	+	core promoter element around -30 of transcription start
Csa2G005890.1	TATA-box	TATAA	2000	-	core promoter element around -30 of transcription start
Csa2G005890.1	TATA-box	TATA	2001	-	core promoter element around -30 of transcription start
Csa2G153580.1	Unnamed__4	CTCC	185	+
Csa2G153580.1	Unnamed__4	CTCC	494	-
Csa2G153580.1	Unnamed__4	CTCC	655	+
Csa2G153580.1	Unnamed__4	CTCC	1335	-
Csa2G153580.1	Unnamed__4	CTCC	1787	-
Csa2G153580.1	Unnamed__4	CTCC	1862	+
Csa2G153580.1	Unnamed__4	CTCC	1934	+
Csa2G153580.1	Unnamed__4	CTCC	1939	+
Csa2G153580.1	TCA	TCATCTTCAT	1760	-
Csa2G153580.1	GARE-motif	TCTGTTG	214	-	gibberellin-responsive element
Csa2G153580.1	TC-rich repeats	GTTTTCTTAC	956	-	cis-acting element involved in defense and stress responsiveness
Csa2G153580.1	MYB-like sequence	TAACCA	315	+
Csa2G153580.1	AT-rich element	ATAGAAATCAA	429	-	binding site of AT-rich DNA binding protein (ATBP-1)
Csa2G153580.1	AT-rich element	ATAGAAATCAA	1504	-	binding site of AT-rich DNA binding protein (ATBP-1)
Csa2G153580.1	GCN4_motif	TGAGTCA	1214	+	cis-regulatory element involved in endosperm expression
Csa2G153580.1	ERE	ATTTCATA	283	+
Csa2G153580.1	ERE	ATTTTAAA	991	-
Csa2G153580.1	ERE	ATTTTAAA	1581	+
Csa2G153580.1	Sp1	GGGCGG	1700	-	light responsive element
Csa2G153580.1	MYB	CAACAG	214	+
Csa2G153580.1	MYB	TAACCA	315	+
Csa2G153580.1	MYB	CAACCA	813	+
Csa2G153580.1	MYB	CAACCA	1410	+
Csa2G153580.1	TGACG-motif	TGACG	232	-	cis-acting regulatory element involved in the MeJA-responsiveness
Csa2G153580.1	TGACG-motif	TGACG	1767	+	cis-acting regulatory element involved in the MeJA-responsiveness
Csa2G153580.1	LAMP-element	CTTTATCA	413	-	part of a light responsive element
Csa2G153580.1	TCT-motif	TCTTAC	536	-	part of a light responsive element
Csa2G153580.1	MYC	CATTTG	1345	-
Csa2G153580.1	MYC	CAATTG	1376	-
Csa2G153580.1	MYC	CATGTG	1948	+
Csa2G153580.1	AAGAA-motif	GAAAGAA	670	-
Csa2G153580.1	AAGAA-motif	GAAAGAA	1712	+
Csa2G153580.1	3-AF3 binding site	CACTATCTAAC	63	+	part of a conserved DNA module array (CMA3)
Csa2G153580.1	WRE3	CCACCT	1851	+
Csa2G153580.1	ARE	AAACCA	251	+	cis-acting regulatory element essential for the anaerobic induction
Csa2G153580.1	CGTCA-motif	CGTCA	232	+	cis-acting regulatory element involved in the MeJA-responsiveness
Csa2G153580.1	CGTCA-motif	CGTCA	1767	-	cis-acting regulatory element involved in the MeJA-responsiveness
Csa2G153580.1	ACE	CTAACGTATT	377	+	cis-acting element involved in light responsiveness
Csa2G153580.1	Box 4	ATTAAT	270	+	part of a conserved DNA module involved in light responsiveness
Csa2G153580.1	Box 4	ATTAAT	1140	-	part of a conserved DNA module involved in light responsiveness
Csa2G153580.1		motif_sequence	94	+	short_function
Csa2G153580.1		motif_sequence	372	+	short_function
Csa2G153580.1		motif_sequence	393	+	short_function
Csa2G153580.1		motif_sequence	653	+	short_function
Csa2G153580.1		motif_sequence	746	+	short_function
Csa2G153580.1		motif_sequence	808	+	short_function
Csa2G153580.1		motif_sequence	826	+	short_function
Csa2G153580.1		motif_sequence	1083	-	short_function
Csa2G153580.1		motif_sequence	1771	-	short_function
Csa2G153580.1		motif_sequence	1860	+	short_function
Csa2G153580.1		motif_sequence	2003	+	short_function
Csa2G153580.1	W box	TTGACC	306	+
Csa2G153580.1	Myb-binding site	CAACAG	214	+
Csa2G153580.1	GATA-motif	AAGATAAGATT	636	+	part of a light responsive element
Csa2G153580.1	as-1	TGACG	232	-
Csa2G153580.1	as-1	TGACG	1767	+
Csa2G153580.1	STRE	AGGGG	1936	-
Csa2G153580.1	STRE	AGGGG	2008	-
Csa2G153580.1	CAAT-box	CAAT	54	-
Csa2G153580.1	CAAT-box	CAAT	78	-
Csa2G153580.1	CAAT-box	CAAT	299	+
Csa2G153580.1	CAAT-box	CAAAT	311	+	common cis-acting element in promoter and enhancer regions
Csa2G153580.1	CAAT-box	CAAT	329	+
Csa2G153580.1	CAAT-box	CAAAT	361	+	common cis-acting element in promoter and enhancer regions
Csa2G153580.1	CAAT-box	CAAT	370	+
Csa2G153580.1	CAAT-box	CAAT	411	-
Csa2G153580.1	CAAT-box	CAAAT	432	-	common cis-acting element in promoter and enhancer regions
Csa2G153580.1	CAAT-box	CAAT	469	-
Csa2G153580.1	CAAT-box	CAAAT	588	-	common cis-acting element in promoter and enhancer regions
Csa2G153580.1	CAAT-box	CAAAT	609	-	common cis-acting element in promoter and enhancer regions
Csa2G153580.1	CAAT-box	CCAAT	743	+	common cis-acting element in promoter and enhancer regions
Csa2G153580.1	CAAT-box	CAAT	744	+
Csa2G153580.1	CAAT-box	CAAAT	777	-	common cis-acting element in promoter and enhancer regions
Csa2G153580.1	CAAT-box	CAAT	861	-
Csa2G153580.1	CAAT-box	CAAT	894	-
Csa2G153580.1	CAAT-box	CAAT	906	-
Csa2G153580.1	CAAT-box	CAAAT	934	-	common cis-acting element in promoter and enhancer regions
Csa2G153580.1	CAAT-box	CAAAT	1035	+	common cis-acting element in promoter and enhancer regions
Csa2G153580.1	CAAT-box	CAAAT	1054	-	common cis-acting element in promoter and enhancer regions
Csa2G153580.1	CAAT-box	CAAT	1165	+
Csa2G153580.1	CAAT-box	CAAAT	1219	+	common cis-acting element in promoter and enhancer regions
Csa2G153580.1	CAAT-box	CAAAT	1276	+	common cis-acting element in promoter and enhancer regions
Csa2G153580.1	CAAT-box	CAAAT	1345	+	common cis-acting element in promoter and enhancer regions
Csa2G153580.1	CAAT-box	CAAAT	1358	+	common cis-acting element in promoter and enhancer regions
Csa2G153580.1	CAAT-box	CAAT	1369	+
Csa2G153580.1	CAAT-box	CAAT	1376	+
Csa2G153580.1	CAAT-box	CCAAT	1378	-	common cis-acting element in promoter and enhancer regions
Csa2G153580.1	CAAT-box	CCAAT	1413	+	common cis-acting element in promoter and enhancer regions
Csa2G153580.1	CAAT-box	CAAT	1414	+
Csa2G153580.1	CAAT-box	CAAAT	1416	-	common cis-acting element in promoter and enhancer regions
Csa2G153580.1	CAAT-box	CAAAT	1486	+	common cis-acting element in promoter and enhancer regions
Csa2G153580.1	CAAT-box	CAAAT	1502	-	common cis-acting element in promoter and enhancer regions
Csa2G153580.1	CAAT-box	CAAAT	1574	-	common cis-acting element in promoter and enhancer regions
Csa2G153580.1	CAAT-box	CAAAT	1648	+	common cis-acting element in promoter and enhancer regions
Csa2G153580.1	CAAT-box	CAAAT	1838	-	common cis-acting element in promoter and enhancer regions
Csa2G153580.1	CAAT-box	CAAT	1957	+
Csa2G153580.1	AT~TATA-box	TATATAAA	1438	-
Csa2G153580.1	AT~TATA-box	TATATA	1440	-
Csa2G153580.1	AT~TATA-box	TATATA	1604	-
Csa2G153580.1	AE-box	AGAAACTT	539	+	part of a module for light response
Csa2G153580.1	AE-box	AGAAACAA	723	-	part of a module for light response
Csa2G153580.1	TATA-box	TATA	35	+	core promoter element around -30 of transcription start
Csa2G153580.1	TATA-box	TATA	43	+	core promoter element around -30 of transcription start
Csa2G153580.1	TATA-box	ATTATA	46	+	core promoter element around -30 of transcription start
Csa2G153580.1	TATA-box	TATAA	47	-	core promoter element around -30 of transcription start
Csa2G153580.1	TATA-box	TATA	48	+	core promoter element around -30 of transcription start
Csa2G153580.1	TATA-box	ATTATA	384	+	core promoter element around -30 of transcription start
Csa2G153580.1	TATA-box	TATAA	385	-	core promoter element around -30 of transcription start
Csa2G153580.1	TATA-box	TATA	386	+	core promoter element around -30 of transcription start
Csa2G153580.1	TATA-box	TATA	482	+	core promoter element around -30 of transcription start
Csa2G153580.1	TATA-box	taTATAAAtc	616	-	core promoter element around -30 of transcription start
Csa2G153580.1	TATA-box	TATAAAT	617	-	core promoter element around -30 of transcription start
Csa2G153580.1	TATA-box	TATAAA	618	-	core promoter element around -30 of transcription start
Csa2G153580.1	TATA-box	TATAA	619	-	core promoter element around -30 of transcription start
Csa2G153580.1	TATA-box	TATA	620	+	core promoter element around -30 of transcription start
Csa2G153580.1	TATA-box	TATACA	680	-	core promoter element around -30 of transcription start
Csa2G153580.1	TATA-box	TATA	682	+	core promoter element around -30 of transcription start
Csa2G153580.1	TATA-box	ccTATAAAaa	709	-	core promoter element around -30 of transcription start
Csa2G153580.1	TATA-box	TATAAAA	710	-	core promoter element around -30 of transcription start
Csa2G153580.1	TATA-box	TATAAA	711	-	core promoter element around -30 of transcription start
Csa2G153580.1	TATA-box	TATAA	712	-	core promoter element around -30 of transcription start
Csa2G153580.1	TATA-box	TATA	713	+	core promoter element around -30 of transcription start
Csa2G153580.1	TATA-box	TATAAA	730	-	core promoter element around -30 of transcription start
Csa2G153580.1	TATA-box	TATAA	731	-	core promoter element around -30 of transcription start
Csa2G153580.1	TATA-box	TATA	732	+	core promoter element around -30 of transcription start
Csa2G153580.1	TATA-box	TATAAAT	783	-	core promoter element around -30 of transcription start
Csa2G153580.1	TATA-box	TATAAA	784	-	core promoter element around -30 of transcription start
Csa2G153580.1	TATA-box	TATAA	785	-	core promoter element around -30 of transcription start
Csa2G153580.1	TATA-box	TATA	786	+	core promoter element around -30 of transcription start
Csa2G153580.1	TATA-box	ATATAT	902	+	core promoter element around -30 of transcription start
Csa2G153580.1	TATA-box	TATA	903	+	core promoter element around -30 of transcription start
Csa2G153580.1	TATA-box	ATTATA	920	+	core promoter element around -30 of transcription start
Csa2G153580.1	TATA-box	TATAA	921	-	core promoter element around -30 of transcription start
Csa2G153580.1	TATA-box	TATA	922	+	core promoter element around -30 of transcription start
Csa2G153580.1	TATA-box	ATTATA	985	+	core promoter element around -30 of transcription start
Csa2G153580.1	TATA-box	TATAA	986	-	core promoter element around -30 of transcription start
Csa2G153580.1	TATA-box	TATA	987	+	core promoter element around -30 of transcription start
Csa2G153580.1	TATA-box	TATTTAAA	989	+	core promoter element around -30 of transcription start
Csa2G153580.1	TATA-box	TATAA	1113	-	core promoter element around -30 of transcription start
Csa2G153580.1	TATA-box	TATA	1114	-	core promoter element around -30 of transcription start
Csa2G153580.1	TATA-box	TATAAA	1124	-	core promoter element around -30 of transcription start
Csa2G153580.1	TATA-box	TATAA	1125	-	core promoter element around -30 of transcription start
Csa2G153580.1	TATA-box	TATA	1126	-	core promoter element around -30 of transcription start
Csa2G153580.1	TATA-box	TATA	1155	-	core promoter element around -30 of transcription start
Csa2G153580.1	TATA-box	TATAAAA	1170	-	core promoter element around -30 of transcription start
Csa2G153580.1	TATA-box	TATAAA	1171	-	core promoter element around -30 of transcription start
Csa2G153580.1	TATA-box	TATAA	1172	-	core promoter element around -30 of transcription start
Csa2G153580.1	TATA-box	TATA	1173	-	core promoter element around -30 of transcription start
Csa2G153580.1	TATA-box	TATA	1198	-	core promoter element around -30 of transcription start
Csa2G153580.1	TATA-box	ccTATAAAaa	1263	-	core promoter element around -30 of transcription start
Csa2G153580.1	TATA-box	TATAAAA	1264	-	core promoter element around -30 of transcription start
Csa2G153580.1	TATA-box	TATAAA	1265	-	core promoter element around -30 of transcription start
Csa2G153580.1	TATA-box	TATAA	1266	-	core promoter element around -30 of transcription start
Csa2G153580.1	TATA-box	TATA	1267	-	core promoter element around -30 of transcription start
Csa2G153580.1	TATA-box	ATTATA	1400	+	core promoter element around -30 of transcription start
Csa2G153580.1	TATA-box	TATAA	1401	-	core promoter element around -30 of transcription start
Csa2G153580.1	TATA-box	TATA	1402	-	core promoter element around -30 of transcription start
Csa2G153580.1	TATA-box	ATATAA	1425	+	core promoter element around -30 of transcription start
Csa2G153580.1	TATA-box	TATA	1426	-	core promoter element around -30 of transcription start
Csa2G153580.1	TATA-box	taTATAAAtc	1436	-	core promoter element around -30 of transcription start
Csa2G153580.1	TATA-box	TATAAAT	1437	-	core promoter element around -30 of transcription start
Csa2G153580.1	TATA-box	ccTATAAAaa	1438	-	core promoter element around -30 of transcription start
Csa2G153580.1	TATA-box	TATATAA	1439	-	core promoter element around -30 of transcription start
Csa2G153580.1	TATA-box	TATATA	1440	-	core promoter element around -30 of transcription start
Csa2G153580.1	TATA-box	TATA	1442	-	core promoter element around -30 of transcription start
Csa2G153580.1	TATA-box	ATTATA	1489	+	core promoter element around -30 of transcription start
Csa2G153580.1	TATA-box	TATAA	1490	-	core promoter element around -30 of transcription start
Csa2G153580.1	TATA-box	TATA	1491	-	core promoter element around -30 of transcription start
Csa2G153580.1	TATA-box	TATA	1537	-	core promoter element around -30 of transcription start
Csa2G153580.1	TATA-box	TACAAAA	1544	-	core promoter element around -30 of transcription start
Csa2G153580.1	TATA-box	ccTATAAAaa	1545	-	core promoter element around -30 of transcription start
Csa2G153580.1	TATA-box	TATACA	1547	-	core promoter element around -30 of transcription start
Csa2G153580.1	TATA-box	TATA	1549	-	core promoter element around -30 of transcription start
Csa2G153580.1	TATA-box	TACAAAA	1565	-	core promoter element around -30 of transcription start
Csa2G153580.1	TATA-box	ATTATA	1602	+	core promoter element around -30 of transcription start
Csa2G153580.1	TATA-box	TATATAA	1603	-	core promoter element around -30 of transcription start
Csa2G153580.1	TATA-box	TATATA	1604	-	core promoter element around -30 of transcription start
Csa2G153580.1	TATA-box	TATA	1606	-	core promoter element around -30 of transcription start
Csa2G153580.1	TATA-box	TATA	1611	-	core promoter element around -30 of transcription start
Csa2G153580.1	TATA-box	TATTTAAA	1640	+	core promoter element around -30 of transcription start
Csa2G153580.1	TATA-box	TACATAAA	1728	-	core promoter element around -30 of transcription start
Csa2G153580.1	TATA-box	TATAAA	1913	-	core promoter element around -30 of transcription start
Csa2G153580.1	TATA-box	TATAA	1914	-	core promoter element around -30 of transcription start
Csa2G153580.1	TATA-box	TATA	1915	-	core promoter element around -30 of transcription start
Csa2G153580.1	TATA-box	ATTATA	1959	+	core promoter element around -30 of transcription start
Csa2G153580.1	TATA-box	TATAA	1960	-	core promoter element around -30 of transcription start
Csa2G153580.1	TATA-box	TATA	1961	-	core promoter element around -30 of transcription start
Csa2G153580.1	TATA	TATAAAAT	1537	+
Csa2G153580.1	TATA	TATAAAAT	1611	+
Csa2G335550.1	Unnamed__6	taTAAATATct	975	+
Csa2G335550.1	Box III	atCATTTTCACt	1574	+	protein binding site
Csa2G335550.1	TATA-box	TATA	319	+	core promoter element around -30 of transcription start
Csa2G335550.1	TATA-box	ATTATA	363	+	core promoter element around -30 of transcription start
Csa2G335550.1	TATA-box	TATATAA	364	-	core promoter element around -30 of transcription start
Csa2G335550.1	TATA-box	TATATA	365	+	core promoter element around -30 of transcription start
Csa2G335550.1	TATA-box	ATATAT	366	+	core promoter element around -30 of transcription start
Csa2G335550.1	TATA-box	TATATA	367	+	core promoter element around -30 of transcription start
Csa2G335550.1	TATA-box	ATATAT	368	+	core promoter element around -30 of transcription start
Csa2G335550.1	TATA-box	TATATA	369	+	core promoter element around -30 of transcription start
Csa2G335550.1	TATA-box	ATATAT	370	+	core promoter element around -30 of transcription start
Csa2G335550.1	TATA-box	TATATA	371	+	core promoter element around -30 of transcription start
Csa2G335550.1	TATA-box	ATATAT	372	+	core promoter element around -30 of transcription start
Csa2G335550.1	TATA-box	TATATA	373	+	core promoter element around -30 of transcription start
Csa2G335550.1	TATA-box	ATATAT	374	+	core promoter element around -30 of transcription start
Csa2G335550.1	TATA-box	TATATA	375	+	core promoter element around -30 of transcription start
Csa2G335550.1	TATA-box	ATATAT	376	+	core promoter element around -30 of transcription start
Csa2G335550.1	TATA-box	TATA	377	+	core promoter element around -30 of transcription start
Csa2G335550.1	TATA-box	TATACA	423	-	core promoter element around -30 of transcription start
Csa2G335550.1	TATA-box	TATA	425	+	core promoter element around -30 of transcription start
Csa2G335550.1	TATA-box	TATACA	630	-	core promoter element around -30 of transcription start
Csa2G335550.1	TATA-box	TATA	632	+	core promoter element around -30 of transcription start
Csa2G335550.1	TATA-box	TACAAAA	878	+	core promoter element around -30 of transcription start
Csa2G335550.1	TATA-box	ATATAA	885	+	core promoter element around -30 of transcription start
Csa2G335550.1	TATA-box	TATA	886	+	core promoter element around -30 of transcription start
Csa2G335550.1	TATA-box	TATAAA	1001	-	core promoter element around -30 of transcription start
Csa2G335550.1	TATA-box	TATAA	1002	-	core promoter element around -30 of transcription start
Csa2G335550.1	TATA-box	TATA	1003	+	core promoter element around -30 of transcription start
Csa2G335550.1	TATA-box	TACAAAA	1022	+	core promoter element around -30 of transcription start
Csa2G335550.1	TATA-box	ATTATA	1033	+	core promoter element around -30 of transcription start
Csa2G335550.1	TATA-box	TATAA	1034	-	core promoter element around -30 of transcription start
Csa2G335550.1	TATA-box	TATA	1035	-	core promoter element around -30 of transcription start
Csa2G335550.1	TATA-box	TATACA	1054	-	core promoter element around -30 of transcription start
Csa2G335550.1	TATA-box	TATA	1056	-	core promoter element around -30 of transcription start
Csa2G335550.1	TATA-box	TATA	1115	-	core promoter element around -30 of transcription start
Csa2G335550.1	TATA-box	TATAA	1357	-	core promoter element around -30 of transcription start
Csa2G335550.1	TATA-box	TATA	1358	-	core promoter element around -30 of transcription start
Csa2G335550.1	TATA-box	TATAAA	1366	-	core promoter element around -30 of transcription start
Csa2G335550.1	TATA-box	TATAA	1367	-	core promoter element around -30 of transcription start
Csa2G335550.1	TATA-box	TATA	1368	-	core promoter element around -30 of transcription start
Csa2G335550.1	TATA-box	ATTATA	1383	+	core promoter element around -30 of transcription start
Csa2G335550.1	TATA-box	TATAA	1384	-	core promoter element around -30 of transcription start
Csa2G335550.1	TATA-box	TATA	1385	-	core promoter element around -30 of transcription start
Csa2G335550.1	TATA-box	TATA	1742	-	core promoter element around -30 of transcription start
Csa2G335550.1	TATA-box	ATTATA	1851	+	core promoter element around -30 of transcription start
Csa2G335550.1	TATA-box	TATAA	1852	-	core promoter element around -30 of transcription start
Csa2G335550.1	TATA-box	TATA	1853	-	core promoter element around -30 of transcription start
Csa2G335550.1	TATA-box	TATTTAAA	1855	+	core promoter element around -30 of transcription start
Csa2G335550.1	AT~TATA-box	TATATA	365	+
Csa2G335550.1	AT~TATA-box	TATATA	367	+
Csa2G335550.1	AT~TATA-box	TATATA	369	+
Csa2G335550.1	AT~TATA-box	TATATA	371	+
Csa2G335550.1	AT~TATA-box	TATATA	373	+
Csa2G335550.1	AT~TATA-box	TATATA	375	+
Csa2G335550.1	P-box	CCTTTTG	805	+	gibberellin-responsive element
Csa2G335550.1	P-box	CCTTTTG	1555	+	gibberellin-responsive element
Csa2G335550.1	CAAT-box	CAAT	211	-
Csa2G335550.1	CAAT-box	CAAT	224	+
Csa2G335550.1	CAAT-box	CAAT	323	+
Csa2G335550.1	CAAT-box	CAAT	334	-
Csa2G335550.1	CAAT-box	CAAT	347	+
Csa2G335550.1	CAAT-box	CAAT	359	+
Csa2G335550.1	CAAT-box	CAAAT	386	-	common cis-acting element in promoter and enhancer regions
Csa2G335550.1	CAAT-box	CAAT	397	-
Csa2G335550.1	CAAT-box	CAAT	410	+
Csa2G335550.1	CAAT-box	CAAT	421	-
Csa2G335550.1	CAAT-box	CAAT	520	-
Csa2G335550.1	CAAT-box	CAAT	566	+
Csa2G335550.1	CAAT-box	CAAAT	602	+	common cis-acting element in promoter and enhancer regions
Csa2G335550.1	CAAT-box	CAAT	625	-
Csa2G335550.1	CAAT-box	CAAT	705	+
Csa2G335550.1	CAAT-box	CAAAT	765	-	common cis-acting element in promoter and enhancer regions
Csa2G335550.1	CAAT-box	CAAT	796	+
Csa2G335550.1	CAAT-box	CAAAT	865	+	common cis-acting element in promoter and enhancer regions
Csa2G335550.1	CAAT-box	CAAT	908	+
Csa2G335550.1	CAAT-box	CAAAT	943	+	common cis-acting element in promoter and enhancer regions
Csa2G335550.1	CAAT-box	CAAT	971	-
Csa2G335550.1	CAAT-box	CAAT	1015	+
Csa2G335550.1	CAAT-box	CAAAT	1076	+	common cis-acting element in promoter and enhancer regions
Csa2G335550.1	CAAT-box	CAAT	1123	-
Csa2G335550.1	CAAT-box	CAAT	1183	-
Csa2G335550.1	CAAT-box	CAAT	1299	-
Csa2G335550.1	CAAT-box	CAAT	1374	-
Csa2G335550.1	CAAT-box	CAAT	1381	+
Csa2G335550.1	CAAT-box	CCAAT	1510	+	common cis-acting element in promoter and enhancer regions
Csa2G335550.1	CAAT-box	CAAT	1511	+
Csa2G335550.1	CAAT-box	CAAT	1527	+
Csa2G335550.1	CAAT-box	CAAAT	1596	-	common cis-acting element in promoter and enhancer regions
Csa2G335550.1	CAAT-box	CAAT	1636	+
Csa2G335550.1	CAAT-box	CAAAT	1645	-	common cis-acting element in promoter and enhancer regions
Csa2G335550.1	CAAT-box	CAAAT	1658	-	common cis-acting element in promoter and enhancer regions
Csa2G335550.1	CAAT-box	CAAT	1701	+
Csa2G335550.1	CAAT-box	CAAT	1703	-
Csa2G335550.1	CAAT-box	CAAT	1714	-
Csa2G335550.1	CAAT-box	CAAAT	1738	+	common cis-acting element in promoter and enhancer regions
Csa2G335550.1	CAAT-box	CAAT	1747	+
Csa2G335550.1	CAAT-box	CAAT	1761	+
Csa2G335550.1	CAAT-box	CCAAT	1877	+	common cis-acting element in promoter and enhancer regions
Csa2G335550.1	CAAT-box	CAAT	1878	+
Csa2G335550.1	CAAT-box	TGCCAAC	1882	-	common cis-acting element in promoter and enhancer regions
Csa2G335550.1	CAAT-box	CAAT	1890	-
Csa2G335550.1	CAAT-box	CAAAT	1996	+	common cis-acting element in promoter and enhancer regions
Csa2G335550.1	Box 4	ATTAAT	594	+	part of a conserved DNA module involved in light responsiveness
Csa2G335550.1	Box 4	ATTAAT	823	+	part of a conserved DNA module involved in light responsiveness
Csa2G335550.1	Box 4	ATTAAT	1142	-	part of a conserved DNA module involved in light responsiveness
Csa2G335550.1	Box 4	ATTAAT	1255	-	part of a conserved DNA module involved in light responsiveness
Csa2G335550.1	Box 4	ATTAAT	1306	-	part of a conserved DNA module involved in light responsiveness
Csa2G335550.1	Box 4	ATTAAT	1452	-	part of a conserved DNA module involved in light responsiveness
Csa2G335550.1	GT1-motif	GGTTAA	801	-	light responsive element
Csa2G335550.1	circadian	CAAAGATATC	337	-	cis-acting regulatory element involved in circadian control
Csa2G335550.1	circadian	CAAAGATATC	401	+	cis-acting regulatory element involved in circadian control
Csa2G335550.1	MBS	CAACTG	1612	-	MYB binding site involved in drought-inducibility
Csa2G335550.1	ARE	AAACCA	1317	+	cis-acting regulatory element essential for the anaerobic induction
Csa2G335550.1	GATA-motif	AAGATAAGATT	733	-	part of a light responsive element
Csa2G335550.1	GATA-motif	GATAGGA	1662	+	part of a light responsive element
Csa2G335550.1	W box	TTGACC	212	+
Csa2G335550.1	W box	TTGACC	530	-
Csa2G335550.1		motif_sequence	724	-	short_function
Csa2G335550.1		motif_sequence	734	+	short_function
Csa2G335550.1		motif_sequence	1440	+	short_function
Csa2G335550.1		motif_sequence	1607	+	short_function
Csa2G335550.1		motif_sequence	1710	-	short_function
Csa2G335550.1		motif_sequence	1863	-	short_function
Csa2G335550.1		motif_sequence	2006	-	short_function
Csa2G335550.1	MYC	CATTTG	865	-
Csa2G335550.1	MYC	CAATTG	1701	-
Csa2G335550.1	AAGAA-motif	GAAAGAA	617	+
Csa2G335550.1	AAGAA-motif	GAAAGAA	1960	+
Csa2G335550.1	AP-1	TGAGTTAG	1977	+
Csa2G335550.1	Unnamed__4	CTCC	181	-
Csa2G335550.1	Unnamed__4	CTCC	830	+
Csa2G335550.1	Unnamed__4	CTCC	1047	-
Csa2G335550.1	Unnamed__4	CTCC	1411	-
Csa2G335550.1	TCT-motif	TCTTAC	875	+	part of a light responsive element
Csa2G335550.1	TCT-motif	TCTTAC	1617	-	part of a light responsive element
Csa2G335550.1	TCT-motif	TCTTAC	1802	-	part of a light responsive element
Csa2G335550.1	TCT-motif	TCTTAC	1984	-	part of a light responsive element
Csa2G335550.1	MYB	CAACCA	198	-
Csa2G335550.1	MYB	CAACCA	697	+
Csa2G335550.1	ERE	ATTTTAAA	580	+
Csa2G335550.1	Myb	CAACTG	1612	-
Csa2G335550.1	Myb	TAACTG	2011	+
Csa2G335550.1	MRE	AACCTAA	1753	+	MYB binding site involved in light responsiveness
Csa2G335550.1	TCA-element	CCATCTTTTT	771	+	cis-acting element involved in salicylic acid responsiveness
Csa2G335550.1	TCA-element	TCAGAAGAGG	2000	+	cis-acting element involved in salicylic acid responsiveness
Csa2G335550.1	AT-rich element	ATAGAAATCAA	1743	+	binding site of AT-rich DNA binding protein (ATBP-1)
Csa2G335550.1	TC-rich repeats	GTTTTCTTAC	1802	-	cis-acting element involved in defense and stress responsiveness
Csa2G335550.1	TC-rich repeats	GTTTTCTTAC	1984	-	cis-acting element involved in defense and stress responsiveness
Csa2G379370.1	CCGTCC-box	CCGTCC	207	+
Csa2G379370.1		motif_sequence	237	+	short_function
Csa2G379370.1		motif_sequence	352	+	short_function
Csa2G379370.1		motif_sequence	506	-	short_function
Csa2G379370.1		motif_sequence	560	+	short_function
Csa2G379370.1		motif_sequence	571	-	short_function
Csa2G379370.1		motif_sequence	613	-	short_function
Csa2G379370.1		motif_sequence	827	+	short_function
Csa2G379370.1		motif_sequence	887	-	short_function
Csa2G379370.1		motif_sequence	1001	-	short_function
Csa2G379370.1		motif_sequence	1206	+	short_function
Csa2G379370.1		motif_sequence	1949	+	short_function
Csa2G379370.1		motif_sequence	2012	+	short_function
Csa2G379370.1	Myb-binding site	CAACAG	1684	-
Csa2G379370.1	ARE	AAACCA	930	-	cis-acting regulatory element essential for the anaerobic induction
Csa2G379370.1	box S	AGCCACC	1851	+
Csa2G379370.1	AuxRR-core	GGTCCAT	1229	+	cis-acting regulatory element involved in auxin responsiveness
Csa2G379370.1	CGTCA-motif	CGTCA	900	-	cis-acting regulatory element involved in the MeJA-responsiveness
Csa2G379370.1	A-box	CCGTCC	207	+	cis-acting regulatory element
Csa2G379370.1	Box 4	ATTAAT	132	+	part of a conserved DNA module involved in light responsiveness
Csa2G379370.1	Box 4	ATTAAT	154	+	part of a conserved DNA module involved in light responsiveness
Csa2G379370.1	Box 4	ATTAAT	1522	-	part of a conserved DNA module involved in light responsiveness
Csa2G379370.1	Box 4	ATTAAT	2005	-	part of a conserved DNA module involved in light responsiveness
Csa2G379370.1	STRE	AGGGG	1993	+
Csa2G379370.1	CAAT-box	CAAAT	36	-	common cis-acting element in promoter and enhancer regions
Csa2G379370.1	CAAT-box	CAAT	51	-
Csa2G379370.1	CAAT-box	CCAAT	86	-	common cis-acting element in promoter and enhancer regions
Csa2G379370.1	CAAT-box	CCCAATTT	108	+	common cis-acting element in promoter and enhancer regions
Csa2G379370.1	CAAT-box	CCAAT	109	+	common cis-acting element in promoter and enhancer regions
Csa2G379370.1	CAAT-box	CAAT	110	+
Csa2G379370.1	CAAT-box	CAAT	122	+
Csa2G379370.1	CAAT-box	CAAT	147	+
Csa2G379370.1	CAAT-box	CAAT	152	+
Csa2G379370.1	CAAT-box	CAAT	163	-
Csa2G379370.1	CAAT-box	CAAAT	304	-	common cis-acting element in promoter and enhancer regions
Csa2G379370.1	CAAT-box	CAAT	331	-
Csa2G379370.1	CAAT-box	CAAAT	424	-	common cis-acting element in promoter and enhancer regions
Csa2G379370.1	CAAT-box	CAAT	434	-
Csa2G379370.1	CAAT-box	CAAAT	528	-	common cis-acting element in promoter and enhancer regions
Csa2G379370.1	CAAT-box	CAAAT	548	-	common cis-acting element in promoter and enhancer regions
Csa2G379370.1	CAAT-box	CAAAT	557	+	common cis-acting element in promoter and enhancer regions
Csa2G379370.1	CAAT-box	CAAT	592	-
Csa2G379370.1	CAAT-box	CAAAT	599	+	common cis-acting element in promoter and enhancer regions
Csa2G379370.1	CAAT-box	CAAT	806	-
Csa2G379370.1	CAAT-box	CAAT	816	-
Csa2G379370.1	CAAT-box	CAAT	898	-
Csa2G379370.1	CAAT-box	CAAT	951	+
Csa2G379370.1	CAAT-box	CAAAT	983	+	common cis-acting element in promoter and enhancer regions
Csa2G379370.1	CAAT-box	CAAAT	986	-	common cis-acting element in promoter and enhancer regions
Csa2G379370.1	CAAT-box	CCAAT	1049	+	common cis-acting element in promoter and enhancer regions
Csa2G379370.1	CAAT-box	CAAT	1050	+
Csa2G379370.1	CAAT-box	CCAAT	1110	+	common cis-acting element in promoter and enhancer regions
Csa2G379370.1	CAAT-box	CAAT	1111	+
Csa2G379370.1	CAAT-box	CAAT	1116	+
Csa2G379370.1	CAAT-box	CAAT	1146	+
Csa2G379370.1	CAAT-box	CAAAT	1151	+	common cis-acting element in promoter and enhancer regions
Csa2G379370.1	CAAT-box	CAAT	1169	+
Csa2G379370.1	CAAT-box	CCAAT	1280	-	common cis-acting element in promoter and enhancer regions
Csa2G379370.1	CAAT-box	CAAT	1398	-
Csa2G379370.1	CAAT-box	CAAAT	1448	+	common cis-acting element in promoter and enhancer regions
Csa2G379370.1	CAAT-box	CAAT	1537	+
Csa2G379370.1	CAAT-box	CAAT	1555	+
Csa2G379370.1	CAAT-box	CAAT	1564	-
Csa2G379370.1	CAAT-box	CAAAT	1598	-	common cis-acting element in promoter and enhancer regions
Csa2G379370.1	CAAT-box	CAAT	1638	-
Csa2G379370.1	CAAT-box	CAAT	1647	-
Csa2G379370.1	CAAT-box	CAAAT	1695	+	common cis-acting element in promoter and enhancer regions
Csa2G379370.1	CAAT-box	CAAT	1706	-
Csa2G379370.1	CAAT-box	CAAAT	1747	-	common cis-acting element in promoter and enhancer regions
Csa2G379370.1	CAAT-box	CAAT	1818	+
Csa2G379370.1	CAAT-box	CCAAT	1899	+	common cis-acting element in promoter and enhancer regions
Csa2G379370.1	CAAT-box	CAAT	1900	+
Csa2G379370.1	CAAT-box	CAAAT	1912	+	common cis-acting element in promoter and enhancer regions
Csa2G379370.1	CAAT-box	CAAT	1928	-
Csa2G379370.1	CAAT-box	CAAT	1999	-
Csa2G379370.1	AT~TATA-box	TATATA	791	+
Csa2G379370.1	AT~TATA-box	TATATA	1496	-
Csa2G379370.1	AT~TATA-box	TATATA	1593	-
Csa2G379370.1	AT~TATA-box	TATATAAA	1772	-
Csa2G379370.1	AT~TATA-box	TATATA	1774	-
Csa2G379370.1	AT~TATA-box	TATATA	1776	-
Csa2G379370.1	AE-box	AGAAACAA	1289	+	part of a module for light response
Csa2G379370.1	TATA-box	ATTATA	273	+	core promoter element around -30 of transcription start
Csa2G379370.1	TATA-box	TATAA	274	-	core promoter element around -30 of transcription start
Csa2G379370.1	TATA-box	TATA	275	+	core promoter element around -30 of transcription start
Csa2G379370.1	TATA-box	TATTTAAA	287	+	core promoter element around -30 of transcription start
Csa2G379370.1	TATA-box	TATA	385	+	core promoter element around -30 of transcription start
Csa2G379370.1	TATA-box	TATA	722	+	core promoter element around -30 of transcription start
Csa2G379370.1	TATA-box	ATATAT	790	+	core promoter element around -30 of transcription start
Csa2G379370.1	TATA-box	TATATA	791	+	core promoter element around -30 of transcription start
Csa2G379370.1	TATA-box	ATATAA	792	+	core promoter element around -30 of transcription start
Csa2G379370.1	TATA-box	TATA	793	+	core promoter element around -30 of transcription start
Csa2G379370.1	TATA-box	TATACA	1188	-	core promoter element around -30 of transcription start
Csa2G379370.1	TATA-box	TATA	1190	-	core promoter element around -30 of transcription start
Csa2G379370.1	TATA-box	TATA	1347	-	core promoter element around -30 of transcription start
Csa2G379370.1	TATA-box	TATTTAAA	1387	-	core promoter element around -30 of transcription start
Csa2G379370.1	TATA-box	TACAAAA	1483	-	core promoter element around -30 of transcription start
Csa2G379370.1	TATA-box	TATATA	1496	-	core promoter element around -30 of transcription start
Csa2G379370.1	TATA-box	ATATAT	1497	-	core promoter element around -30 of transcription start
Csa2G379370.1	TATA-box	TATA	1498	-	core promoter element around -30 of transcription start
Csa2G379370.1	TATA-box	ATATAT	1592	-	core promoter element around -30 of transcription start
Csa2G379370.1	TATA-box	TATATA	1593	-	core promoter element around -30 of transcription start
Csa2G379370.1	TATA-box	ATATAT	1594	-	core promoter element around -30 of transcription start
Csa2G379370.1	TATA-box	TATA	1595	-	core promoter element around -30 of transcription start
Csa2G379370.1	TATA-box	ATTATA	1608	+	core promoter element around -30 of transcription start
Csa2G379370.1	TATA-box	TATAA	1609	-	core promoter element around -30 of transcription start
Csa2G379370.1	TATA-box	TATA	1610	-	core promoter element around -30 of transcription start
Csa2G379370.1	TATA-box	taTATAAAtc	1770	-	core promoter element around -30 of transcription start
Csa2G379370.1	TATA-box	TATAAAT	1771	-	core promoter element around -30 of transcription start
Csa2G379370.1	TATA-box	TATAAA	1772	-	core promoter element around -30 of transcription start
Csa2G379370.1	TATA-box	TATATAA	1773	-	core promoter element around -30 of transcription start
Csa2G379370.1	TATA-box	TATATA	1774	-	core promoter element around -30 of transcription start
Csa2G379370.1	TATA-box	ATATAT	1775	-	core promoter element around -30 of transcription start
Csa2G379370.1	TATA-box	TATATA	1776	-	core promoter element around -30 of transcription start
Csa2G379370.1	TATA-box	ATATAT	1777	-	core promoter element around -30 of transcription start
Csa2G379370.1	TATA-box	TATA	1778	-	core promoter element around -30 of transcription start
Csa2G379370.1	TATA-box	TATA	1892	-	core promoter element around -30 of transcription start
Csa2G379370.1	as-1	TGACG	900	+
Csa2G379370.1	Unnamed__1	CGTGG	245	-
Csa2G379370.1	GCN4_motif	TGAGTCA	1363	+	cis-regulatory element involved in endosperm expression
Csa2G379370.1	Box II -like sequence	TCCGTGTACCA	97	+	cis-acting regulatory element
Csa2G379370.1	ERE	ATTTCATA	367	+
Csa2G379370.1	ERE	ATTTTAAA	409	+
Csa2G379370.1	MYB	CAACCA	242	+
Csa2G379370.1	MYB	CAACCA	1127	-
Csa2G379370.1	MYB	CAACAG	1684	-
Csa2G379370.1	HD-Zip 3	GTAAT(G/C)ATTAC	126	+	protein binding site
Csa2G379370.1	TGACG-motif	TGACG	900	+	cis-acting regulatory element involved in the MeJA-responsiveness
Csa2G379370.1	Unnamed__4	CTCC	877	-
Csa2G379370.1	Unnamed__4	CTCC	972	-
Csa2G379370.1	Unnamed__4	CTCC	1798	+
Csa2G379370.1	Unnamed__4	CTCC	1867	+
Csa2G379370.1	Unnamed__4	CTCC	1881	+
Csa2G379370.1	Unnamed__4	CTCC	1924	+
Csa2G379370.1	Unnamed__4	CTCC	1937	+
Csa2G379370.1	TCA	TCATCTTCAT	235	+
Csa2G379370.1	TCA	TCATCTTCAT	504	-
Csa2G379370.1	TCA	TCATCTTCAT	569	-
Csa2G379370.1	GARE-motif	TCTGTTG	1683	+	gibberellin-responsive element
Csa2G379370.1	WUN-motif	CCATTTCAA	332	-
Csa2G379370.1	WUN-motif	CCATTTCAA	697	-
Csa2G379370.1	I-box	cCATATCCAAT	140	+	part of a light responsive element
Csa2G379370.1	MYC	CATTTG	35	+
Csa2G379370.1	MYC	CATTTG	527	+
Csa2G379370.1	MYC	CATTTG	599	-
Csa2G379370.1	MYC	CATGTG	1359	+
Csa2G379370.1	MYC	CATGTG	1368	+
Csa2G379370.1	MYC	CATGTG	1713	-
Csa2G379370.1	AAGAA-motif	GAAAGAA	579	+
Csa2G379370.1	AAGAA-motif	GAAAGAA	1194	-
Csa2G379370.1	AAGAA-motif	gGTAAAGAAA	1266	+
Csa2G379370.1	AAGAA-motif	GAAAGAA	1678	-
Csa2G379370.1	CCGTCC motif	CCGTCC	207	+
Csa2G379370.1	Gap-box	CAAATGAA(A/G)A	599	+	part of a light responsive element
Csa2G433930.1	GCN4_motif	TGAGTCA	892	-	cis-regulatory element involved in endosperm expression
Csa2G433930.1	G-Box	CACGTG	54	+	cis-acting regulatory element involved in light responsiveness
Csa2G433930.1	MRE	AACCTAA	1401	-	MYB binding site involved in light responsiveness
Csa2G433930.1	TCA-element	CCATCTTTTT	547	-	cis-acting element involved in salicylic acid responsiveness
Csa2G433930.1	TCA-element	CCATCTTTTT	1799	+	cis-acting element involved in salicylic acid responsiveness
Csa2G433930.1	TC-rich repeats	GTTTTCTTAC	1978	-	cis-acting element involved in defense and stress responsiveness
Csa2G433930.1	MYB-like sequence	TAACCA	826	-
Csa2G433930.1	MYB-like sequence	TAACCA	918	+
Csa2G433930.1	ERE	ATTTTAAA	584	-
Csa2G433930.1	ERE	ATTTTAAA	680	-
Csa2G433930.1	ERE	ATTTTAAA	781	+
Csa2G433930.1	MYB	CAACAG	258	+
Csa2G433930.1	MYB	TAACCA	826	-
Csa2G433930.1	MYB	TAACCA	918	+
Csa2G433930.1	MYB	CAACCA	1754	+
Csa2G433930.1	TCT-motif	TCTTAC	1148	-	part of a light responsive element
Csa2G433930.1	TCT-motif	TCTTAC	1978	-	part of a light responsive element
Csa2G433930.1	TGACG-motif	TGACG	494	-	cis-acting regulatory element involved in the MeJA-responsiveness
Csa2G433930.1	Unnamed__4	CTCC	402	-
Csa2G433930.1	Unnamed__4	CTCC	937	+
Csa2G433930.1	Unnamed__4	CTCC	1298	-
Csa2G433930.1	Unnamed__4	CTCC	1349	-
Csa2G433930.1	Unnamed__4	CTCC	1722	+
Csa2G433930.1	Unnamed__4	CTCC	1877	+
Csa2G433930.1	Unnamed__4	CTCC	2004	+
Csa2G433930.1	WUN-motif	AAATTTCTT	1771	+
Csa2G433930.1	I-box	TGATAATGT	66	-	part of a light responsive element
Csa2G433930.1	MYC	CAATTG	897	+
Csa2G433930.1	MYC	CATTTG	1603	-
Csa2G433930.1	AAGAA-motif	GAAAGAA	1064	-
Csa2G433930.1	AAGAA-motif	GAAAGAA	1871	-
Csa2G433930.1	AAGAA-motif	GAAAGAA	1891	-
Csa2G433930.1	WRE3	CCACCT	349	-
Csa2G433930.1	ABRE	CGCACGTGTC	52	-	cis-acting element involved in the abscisic acid responsiveness
Csa2G433930.1	ABRE	CACGTG	54	+	cis-acting element involved in the abscisic acid responsiveness
Csa2G433930.1	ABRE	ACGTG	55	+	cis-acting element involved in the abscisic acid responsiveness
Csa2G433930.1	CCAAT-box	CAACGG	752	+	MYBHv1 binding site
Csa2G433930.1		motif_sequence	277	+	short_function
Csa2G433930.1		motif_sequence	950	-	short_function
Csa2G433930.1		motif_sequence	1316	+	short_function
Csa2G433930.1		motif_sequence	1349	-	short_function
Csa2G433930.1		motif_sequence	1426	+	short_function
Csa2G433930.1		motif_sequence	1598	+	short_function
Csa2G433930.1		motif_sequence	1815	+	short_function
Csa2G433930.1		motif_sequence	1848	+	short_function
Csa2G433930.1	GATA-motif	AAGATAAGATT	1865	-	part of a light responsive element
Csa2G433930.1	Myb-binding site	CAACAG	258	+
Csa2G433930.1	ARE	AAACCA	1292	-	cis-acting regulatory element essential for the anaerobic induction
Csa2G433930.1	ARE	AAACCA	1407	-	cis-acting regulatory element essential for the anaerobic induction
Csa2G433930.1	GT1-motif	GGTTAA	201	+	light responsive element
Csa2G433930.1	GT1-motif	GGTTAAT	827	+	light responsive element
Csa2G433930.1	GT1-motif	GGTTAA	917	-	light responsive element
Csa2G433930.1	Box 4	ATTAAT	95	+	part of a conserved DNA module involved in light responsiveness
Csa2G433930.1	CGTCA-motif	CGTCA	494	+	cis-acting regulatory element involved in the MeJA-responsiveness
Csa2G433930.1	ACE	CTAACGTATT	109	+	cis-acting element involved in light responsiveness
Csa2G433930.1	STRE	AGGGG	60	-
Csa2G433930.1	STRE	AGGGG	1887	-
Csa2G433930.1	AT~TATA-box	TATATA	128	+
Csa2G433930.1	AT~TATA-box	TATATA	759	+
Csa2G433930.1	AT~TATA-box	TATATA	1764	-
Csa2G433930.1	AT~TATA-box	TATATA	1766	-
Csa2G433930.1	CAAT-box	CAAT	125	+
Csa2G433930.1	CAAT-box	CAAT	176	-
Csa2G433930.1	CAAT-box	CAAT	314	+
Csa2G433930.1	CAAT-box	CAAT	357	-
Csa2G433930.1	CAAT-box	CAAAT	382	+	common cis-acting element in promoter and enhancer regions
Csa2G433930.1	CAAT-box	CCAAT	399	-	common cis-acting element in promoter and enhancer regions
Csa2G433930.1	CAAT-box	CAAT	498	-
Csa2G433930.1	CAAT-box	CAAT	527	-
Csa2G433930.1	CAAT-box	CAAT	623	-
Csa2G433930.1	CAAT-box	CAAT	690	-
Csa2G433930.1	CAAT-box	CAAAT	788	-	common cis-acting element in promoter and enhancer regions
Csa2G433930.1	CAAT-box	CAAT	897	+
Csa2G433930.1	CAAT-box	CAAT	899	-
Csa2G433930.1	CAAT-box	CAAAT	1052	+	common cis-acting element in promoter and enhancer regions
Csa2G433930.1	CAAT-box	CAAT	1059	+
Csa2G433930.1	CAAT-box	CAAT	1118	+
Csa2G433930.1	CAAT-box	CAAAT	1246	+	common cis-acting element in promoter and enhancer regions
Csa2G433930.1	CAAT-box	CAAT	1420	+
Csa2G433930.1	CAAT-box	CAAT	1457	-
Csa2G433930.1	CAAT-box	CAAT	1495	+
Csa2G433930.1	CAAT-box	CCAAT	1544	+	common cis-acting element in promoter and enhancer regions
Csa2G433930.1	CAAT-box	CAAT	1545	+
Csa2G433930.1	CAAT-box	CAAAT	1603	+	common cis-acting element in promoter and enhancer regions
Csa2G433930.1	CAAT-box	CCAAT	1622	+	common cis-acting element in promoter and enhancer regions
Csa2G433930.1	CAAT-box	CAAT	1623	+
Csa2G433930.1	CAAT-box	CAAT	1685	+
Csa2G433930.1	CAAT-box	CAAAT	1690	+	common cis-acting element in promoter and enhancer regions
Csa2G433930.1	CAAT-box	CAAT	1787	-
Csa2G433930.1	CAAT-box	CAAT	1799	+
Csa2G433930.1	CAAT-box	CAAT	1864	+
Csa2G433930.1	CAAT-box	CAAT	1897	+
Csa2G433930.1	CAAT-box	CAAT	1911	+
Csa2G433930.1	CAAT-box	CAAT	1944	+
Csa2G433930.1	TATA-box	TACAAAA	81	-	core promoter element around -30 of transcription start
Csa2G433930.1	TATA-box	ATTATA	116	+	core promoter element around -30 of transcription start
Csa2G433930.1	TATA-box	TATAA	117	-	core promoter element around -30 of transcription start
Csa2G433930.1	TATA-box	TATA	118	+	core promoter element around -30 of transcription start
Csa2G433930.1	TATA-box	ATATAT	127	+	core promoter element around -30 of transcription start
Csa2G433930.1	TATA-box	TATATA	128	+	core promoter element around -30 of transcription start
Csa2G433930.1	TATA-box	ATATAT	129	+	core promoter element around -30 of transcription start
Csa2G433930.1	TATA-box	TATA	130	+	core promoter element around -30 of transcription start
Csa2G433930.1	TATA-box	TACAAAA	189	+	core promoter element around -30 of transcription start
Csa2G433930.1	TATA-box	TATAAAT	330	-	core promoter element around -30 of transcription start
Csa2G433930.1	TATA-box	TATAAA	331	-	core promoter element around -30 of transcription start
Csa2G433930.1	TATA-box	TATAA	332	-	core promoter element around -30 of transcription start
Csa2G433930.1	TATA-box	TATA	333	+	core promoter element around -30 of transcription start
Csa2G433930.1	TATA-box	TACAAAA	338	+	core promoter element around -30 of transcription start
Csa2G433930.1	TATA-box	ATTATA	454	+	core promoter element around -30 of transcription start
Csa2G433930.1	TATA-box	TATAA	455	-	core promoter element around -30 of transcription start
Csa2G433930.1	TATA-box	TATA	456	+	core promoter element around -30 of transcription start
Csa2G433930.1	TATA-box	TATACA	475	-	core promoter element around -30 of transcription start
Csa2G433930.1	TATA-box	TATA	477	+	core promoter element around -30 of transcription start
Csa2G433930.1	TATA-box	TATTTAAA	539	-	core promoter element around -30 of transcription start
Csa2G433930.1	TATA-box	TATATA	759	+	core promoter element around -30 of transcription start
Csa2G433930.1	TATA-box	ATATAA	760	+	core promoter element around -30 of transcription start
Csa2G433930.1	TATA-box	TATA	761	+	core promoter element around -30 of transcription start
Csa2G433930.1	TATA-box	ATTATA	776	+	core promoter element around -30 of transcription start
Csa2G433930.1	TATA-box	TATAA	777	-	core promoter element around -30 of transcription start
Csa2G433930.1	TATA-box	TATA	778	+	core promoter element around -30 of transcription start
Csa2G433930.1	TATA-box	TATA	876	+	core promoter element around -30 of transcription start
Csa2G433930.1	TATA-box	TATA	924	+	core promoter element around -30 of transcription start
Csa2G433930.1	TATA-box	TATA	1197	-	core promoter element around -30 of transcription start
Csa2G433930.1	TATA-box	ATATAA	1327	+	core promoter element around -30 of transcription start
Csa2G433930.1	TATA-box	TATA	1328	-	core promoter element around -30 of transcription start
Csa2G433930.1	TATA-box	TATA	1370	-	core promoter element around -30 of transcription start
Csa2G433930.1	TATA-box	ATTATA	1389	+	core promoter element around -30 of transcription start
Csa2G433930.1	TATA-box	TATAA	1390	-	core promoter element around -30 of transcription start
Csa2G433930.1	TATA-box	TATA	1391	-	core promoter element around -30 of transcription start
Csa2G433930.1	TATA-box	TACATAAA	1410	-	core promoter element around -30 of transcription start
Csa2G433930.1	TATA-box	TATACA	1459	-	core promoter element around -30 of transcription start
Csa2G433930.1	TATA-box	TATA	1461	-	core promoter element around -30 of transcription start
Csa2G433930.1	TATA-box	ATATAT	1763	-	core promoter element around -30 of transcription start
Csa2G433930.1	TATA-box	TATATA	1764	-	core promoter element around -30 of transcription start
Csa2G433930.1	TATA-box	ATATAT	1765	-	core promoter element around -30 of transcription start
Csa2G433930.1	TATA-box	TATATA	1766	-	core promoter element around -30 of transcription start
Csa2G433930.1	TATA-box	ATATAA	1767	+	core promoter element around -30 of transcription start
Csa2G433930.1	TATA-box	TATA	1768	-	core promoter element around -30 of transcription start
Csa2G433930.1	TATA-box	TATA	1830	-	core promoter element around -30 of transcription start
Csa2G433930.1	TATA	TATAAAAT	477	+
Csa2G433930.1	AE-box	AGAAACTT	904	+	part of a module for light response
Csa2G433930.1	MYB recognition site	CCGTTG	752	-
Csa2G433930.1	as-1	TGACG	494	-
Csa2G433930.1	Unnamed__6	taTAAATATct	1768	+
Csa2G433930.1	G-box	CACGTG	54	+	cis-acting regulatory element involved in light responsiveness
Csa3G055950.1	Myc	TCTCTTA	249	+
Csa3G055950.1	Myc	TCTCTTA	260	+
Csa3G055950.1	Myc	TCTCTTA	525	+
Csa3G055950.1	Myc	TCTCTTA	948	+
Csa3G055950.1	Myc	TCTCTTA	1248	+
Csa3G055950.1	MYC	CAATTG	1336	-
Csa3G055950.1	MYC	CATTTG	1516	-
Csa3G055950.1	MYC	CAATTG	1593	-
Csa3G055950.1	AAGAA-motif	gGTAAAGAAA	183	+
Csa3G055950.1	AAGAA-motif	GAAAGAA	331	+
Csa3G055950.1	AAGAA-motif	GAAAGAA	1282	-
Csa3G055950.1	AAGAA-motif	gGTAAAGAAA	1382	-
Csa3G055950.1	3-AF1 binding site	TAAGAGAGGAA	256	-	light responsive element
Csa3G055950.1	TCA	TCATCTTCAT	1630	+
Csa3G055950.1	Unnamed__4	CTCC	864	-
Csa3G055950.1	Unnamed__4	CTCC	968	-
Csa3G055950.1	Unnamed__4	CTCC	1152	-
Csa3G055950.1	Unnamed__4	CTCC	1373	+
Csa3G055950.1	Unnamed__4	CTCC	1422	+
Csa3G055950.1	Unnamed__4	CTCC	1893	-
Csa3G055950.1	MYB	TAACCA	366	-
Csa3G055950.1	MYB	CAACCA	1204	-
Csa3G055950.1	MYB	TAACCA	1231	-
Csa3G055950.1	TCT-motif	TCTTAC	381	+	part of a light responsive element
Csa3G055950.1	TCT-motif	TCTTAC	1485	-	part of a light responsive element
Csa3G055950.1	TGACG-motif	TGACG	1340	+	cis-acting regulatory element involved in the MeJA-responsiveness
Csa3G055950.1	GCN4_motif	TGAGTCA	1302	+	cis-regulatory element involved in endosperm expression
Csa3G055950.1	GCN4_motif	TGAGTCA	1730	+	cis-regulatory element involved in endosperm expression
Csa3G055950.1	AT-rich element	ATAGAAATCAA	172	+	binding site of AT-rich DNA binding protein (ATBP-1)
Csa3G055950.1	TCA-element	CCATCTTTTT	1379	+	cis-acting element involved in salicylic acid responsiveness
Csa3G055950.1	MYB-like sequence	TAACCA	366	-
Csa3G055950.1	MYB-like sequence	TAACCA	1231	-
Csa3G055950.1	ERE	ATTTTAAA	555	+
Csa3G055950.1	ERE	ATTTTAAA	1812	-
Csa3G055950.1	Myb	CAACTG	1913	-
Csa3G055950.1	Unnamed__6	taTAAATATct	51	-
Csa3G055950.1	as-1	TGACG	1340	+
Csa3G055950.1	TATA-box	TATAAAA	41	-	core promoter element around -30 of transcription start
Csa3G055950.1	TATA-box	TATAAA	42	-	core promoter element around -30 of transcription start
Csa3G055950.1	TATA-box	TATAA	43	-	core promoter element around -30 of transcription start
Csa3G055950.1	TATA-box	TATA	44	+	core promoter element around -30 of transcription start
Csa3G055950.1	TATA-box	taTATAAAtc	52	-	core promoter element around -30 of transcription start
Csa3G055950.1	TATA-box	ATATAT	53	+	core promoter element around -30 of transcription start
Csa3G055950.1	TATA-box	TATATA	54	+	core promoter element around -30 of transcription start
Csa3G055950.1	TATA-box	ATATAT	55	+	core promoter element around -30 of transcription start
Csa3G055950.1	TATA-box	TATATA	56	+	core promoter element around -30 of transcription start
Csa3G055950.1	TATA-box	ATATAT	57	+	core promoter element around -30 of transcription start
Csa3G055950.1	TATA-box	TATATA	58	+	core promoter element around -30 of transcription start
Csa3G055950.1	TATA-box	ATATAT	59	+	core promoter element around -30 of transcription start
Csa3G055950.1	TATA-box	TATA	60	+	core promoter element around -30 of transcription start
Csa3G055950.1	TATA-box	TACAAAA	94	-	core promoter element around -30 of transcription start
Csa3G055950.1	TATA-box	TATAAGAA	102	-	core promoter element around -30 of transcription start
Csa3G055950.1	TATA-box	TATAA	105	-	core promoter element around -30 of transcription start
Csa3G055950.1	TATA-box	TATA	106	+	core promoter element around -30 of transcription start
Csa3G055950.1	TATA-box	TATACA	169	-	core promoter element around -30 of transcription start
Csa3G055950.1	TATA-box	TATA	171	+	core promoter element around -30 of transcription start
Csa3G055950.1	TATA-box	TATA	185	+	core promoter element around -30 of transcription start
Csa3G055950.1	TATA-box	ATTATA	345	+	core promoter element around -30 of transcription start
Csa3G055950.1	TATA-box	TATAA	346	-	core promoter element around -30 of transcription start
Csa3G055950.1	TATA-box	TATA	347	+	core promoter element around -30 of transcription start
Csa3G055950.1	TATA-box	TATAA	369	-	core promoter element around -30 of transcription start
Csa3G055950.1	TATA-box	TATA	370	+	core promoter element around -30 of transcription start
Csa3G055950.1	TATA-box	TATA	450	+	core promoter element around -30 of transcription start
Csa3G055950.1	TATA-box	TATA	550	+	core promoter element around -30 of transcription start
Csa3G055950.1	TATA-box	TACAAAA	777	-	core promoter element around -30 of transcription start
Csa3G055950.1	TATA-box	TATA	797	+	core promoter element around -30 of transcription start
Csa3G055950.1	TATA-box	TACATAAA	812	+	core promoter element around -30 of transcription start
Csa3G055950.1	TATA-box	TACAAAA	835	+	core promoter element around -30 of transcription start
Csa3G055950.1	TATA-box	ATTATA	849	+	core promoter element around -30 of transcription start
Csa3G055950.1	TATA-box	TATAA	850	-	core promoter element around -30 of transcription start
Csa3G055950.1	TATA-box	TATA	851	+	core promoter element around -30 of transcription start
Csa3G055950.1	TATA-box	TATATAA	874	-	core promoter element around -30 of transcription start
Csa3G055950.1	TATA-box	TATATA	875	+	core promoter element around -30 of transcription start
Csa3G055950.1	TATA-box	ATATAT	876	+	core promoter element around -30 of transcription start
Csa3G055950.1	TATA-box	TATATA	877	+	core promoter element around -30 of transcription start
Csa3G055950.1	TATA-box	ATATAT	878	+	core promoter element around -30 of transcription start
Csa3G055950.1	TATA-box	TATATA	879	+	core promoter element around -30 of transcription start
Csa3G055950.1	TATA-box	ATATAT	880	+	core promoter element around -30 of transcription start
Csa3G055950.1	TATA-box	TATA	881	+	core promoter element around -30 of transcription start
Csa3G055950.1	TATA-box	TATAAA	1039	-	core promoter element around -30 of transcription start
Csa3G055950.1	TATA-box	TATAA	1040	-	core promoter element around -30 of transcription start
Csa3G055950.1	TATA-box	TATA	1041	-	core promoter element around -30 of transcription start
Csa3G055950.1	TATA-box	TATAA	1252	-	core promoter element around -30 of transcription start
Csa3G055950.1	TATA-box	TATA	1253	-	core promoter element around -30 of transcription start
Csa3G055950.1	TATA-box	TATA	1272	-	core promoter element around -30 of transcription start
Csa3G055950.1	TATA-box	TATA	1402	-	core promoter element around -30 of transcription start
Csa3G055950.1	TATA-box	TATA	1426	-	core promoter element around -30 of transcription start
Csa3G055950.1	TATA-box	ATATAT	1883	-	core promoter element around -30 of transcription start
Csa3G055950.1	TATA-box	TATA	1884	-	core promoter element around -30 of transcription start
Csa3G055950.1	TATA-box	TATAA	1954	-	core promoter element around -30 of transcription start
Csa3G055950.1	TATA-box	TATA	1955	-	core promoter element around -30 of transcription start
Csa3G055950.1	TATA	TATAAAAT	40	-
Csa3G055950.1	TATC-box	TATCCCA	1125	+	cis-acting element involved in gibberellin-responsiveness
Csa3G055950.1	AE-box	AGAAACTT	1275	-	part of a module for light response
Csa3G055950.1	AT~TATA-box	TATATA	54	+
Csa3G055950.1	AT~TATA-box	TATATA	56	+
Csa3G055950.1	AT~TATA-box	TATATA	58	+
Csa3G055950.1	AT~TATA-box	TATATA	875	+
Csa3G055950.1	AT~TATA-box	TATATA	877	+
Csa3G055950.1	AT~TATA-box	TATATA	879	+
Csa3G055950.1	CAAT-box	CAAT	36	-
Csa3G055950.1	CAAT-box	CAAT	72	+
Csa3G055950.1	CAAT-box	CAAAT	110	-	common cis-acting element in promoter and enhancer regions
Csa3G055950.1	CAAT-box	CAAAT	137	+	common cis-acting element in promoter and enhancer regions
Csa3G055950.1	CAAT-box	CAAAT	140	-	common cis-acting element in promoter and enhancer regions
Csa3G055950.1	CAAT-box	CAAT	152	-
Csa3G055950.1	CAAT-box	CAAT	166	+
Csa3G055950.1	CAAT-box	CAAT	192	-
Csa3G055950.1	CAAT-box	CAAAT	294	-	common cis-acting element in promoter and enhancer regions
Csa3G055950.1	CAAT-box	CAAT	312	+
Csa3G055950.1	CAAT-box	CAAT	343	+
Csa3G055950.1	CAAT-box	CAAAT	414	-	common cis-acting element in promoter and enhancer regions
Csa3G055950.1	CAAT-box	CAAAT	463	+	common cis-acting element in promoter and enhancer regions
Csa3G055950.1	CAAT-box	CCAAT	518	+	common cis-acting element in promoter and enhancer regions
Csa3G055950.1	CAAT-box	CAAT	519	+
Csa3G055950.1	CAAT-box	CAAT	643	-
Csa3G055950.1	CAAT-box	CAAT	655	-
Csa3G055950.1	CAAT-box	CAAT	664	-
Csa3G055950.1	CAAT-box	CAAAT	718	+	common cis-acting element in promoter and enhancer regions
Csa3G055950.1	CAAT-box	CAAT	736	+
Csa3G055950.1	CAAT-box	CAAT	741	-
Csa3G055950.1	CAAT-box	CAAAT	828	-	common cis-acting element in promoter and enhancer regions
Csa3G055950.1	CAAT-box	CAAT	847	+
Csa3G055950.1	CAAT-box	CAAT	854	-
Csa3G055950.1	CAAT-box	CAAT	870	-
Csa3G055950.1	CAAT-box	CAAT	910	+
Csa3G055950.1	CAAT-box	CAAT	937	+
Csa3G055950.1	CAAT-box	CAAT	959	+
Csa3G055950.1	CAAT-box	CAAT	974	-
Csa3G055950.1	CAAT-box	CAAT	1006	+
Csa3G055950.1	CAAT-box	CCAAT	1011	+	common cis-acting element in promoter and enhancer regions
Csa3G055950.1	CAAT-box	CAAT	1012	+
Csa3G055950.1	CAAT-box	CAAT	1024	+
Csa3G055950.1	CAAT-box	CAAAT	1034	-	common cis-acting element in promoter and enhancer regions
Csa3G055950.1	CAAT-box	CCAAT	1052	+	common cis-acting element in promoter and enhancer regions
Csa3G055950.1	CAAT-box	CAAT	1053	+
Csa3G055950.1	CAAT-box	CCAAT	1066	-	common cis-acting element in promoter and enhancer regions
Csa3G055950.1	CAAT-box	CAAAT	1076	+	common cis-acting element in promoter and enhancer regions
Csa3G055950.1	CAAT-box	CAAT	1082	+
Csa3G055950.1	CAAT-box	CAAAT	1108	+	common cis-acting element in promoter and enhancer regions
Csa3G055950.1	CAAT-box	CCAAT	1129	+	common cis-acting element in promoter and enhancer regions
Csa3G055950.1	CAAT-box	CAAT	1130	+
Csa3G055950.1	CAAT-box	CAAAT	1144	+	common cis-acting element in promoter and enhancer regions
Csa3G055950.1	CAAT-box	CAAT	1175	-
Csa3G055950.1	CAAT-box	CAAT	1216	-
Csa3G055950.1	CAAT-box	CAAT	1308	-
Csa3G055950.1	CAAT-box	CAAT	1336	+
Csa3G055950.1	CAAT-box	CAAT	1338	-
Csa3G055950.1	CAAT-box	CAAT	1347	+
Csa3G055950.1	CAAT-box	CAAT	1408	+
Csa3G055950.1	CAAT-box	CAAT	1482	-
Csa3G055950.1	CAAT-box	CAAT	1501	+
Csa3G055950.1	CAAT-box	CAAAT	1516	+	common cis-acting element in promoter and enhancer regions
Csa3G055950.1	CAAT-box	CAAT	1563	+
Csa3G055950.1	CAAT-box	CAAT	1593	+
Csa3G055950.1	CAAT-box	CAAT	1595	-
Csa3G055950.1	CAAT-box	CAAT	1781	+
Csa3G055950.1	CAAT-box	CAAAT	1821	-	common cis-acting element in promoter and enhancer regions
Csa3G055950.1	CAAT-box	CCCAATTT	1874	+	common cis-acting element in promoter and enhancer regions
Csa3G055950.1	CAAT-box	CCAAT	1875	+	common cis-acting element in promoter and enhancer regions
Csa3G055950.1	CAAT-box	CAAT	1876	+
Csa3G055950.1	CAAT-box	CAAAT	1878	-	common cis-acting element in promoter and enhancer regions
Csa3G055950.1	CAAT-box	CAAAT	1959	-	common cis-acting element in promoter and enhancer regions
Csa3G055950.1	CAAT-box	CAAT	2015	+
Csa3G055950.1	GA-motif	ATAGATAA	541	+	part of a light responsive element
Csa3G055950.1	GT1-motif	GGTTAAT	1232	+	light responsive element
Csa3G055950.1	HD-Zip 1	CAAT(A/T)ATTG	736	+	element involved in differentiation of the palisade mesophyll cells
Csa3G055950.1	Box 4	ATTAAT	912	+	part of a conserved DNA module involved in light responsiveness
Csa3G055950.1	Box 4	ATTAAT	1168	-	part of a conserved DNA module involved in light responsiveness
Csa3G055950.1	Box 4	ATTAAT	1933	-	part of a conserved DNA module involved in light responsiveness
Csa3G055950.1	CGTCA-motif	CGTCA	1340	-	cis-acting regulatory element involved in the MeJA-responsiveness
Csa3G055950.1	ARE	AAACCA	515	+	cis-acting regulatory element essential for the anaerobic induction
Csa3G055950.1	ARE	AAACCA	561	+	cis-acting regulatory element essential for the anaerobic induction
Csa3G055950.1	ARE	AAACCA	1512	+	cis-acting regulatory element essential for the anaerobic induction
Csa3G055950.1	ARE	AAACCA	1542	+	cis-acting regulatory element essential for the anaerobic induction
Csa3G055950.1	MBS	CAACTG	1913	-	MYB binding site involved in drought-inducibility
Csa3G055950.1		motif_sequence	521	+	short_function
Csa3G055950.1		motif_sequence	629	+	short_function
Csa3G055950.1		motif_sequence	635	-	short_function
Csa3G055950.1		motif_sequence	658	-	short_function
Csa3G055950.1		motif_sequence	864	-	short_function
Csa3G055950.1		motif_sequence	968	-	short_function
Csa3G055950.1		motif_sequence	986	+	short_function
Csa3G055950.1		motif_sequence	1152	-	short_function
Csa3G055950.1		motif_sequence	1586	-	short_function
Csa3G055950.1		motif_sequence	1615	+	short_function
Csa3G055950.1		motif_sequence	1747	+	short_function
Csa3G055950.1		motif_sequence	1870	+	short_function
Csa3G055950.1		motif_sequence	1893	-	short_function
Csa3G055950.1	GATA-motif	AAGATAAGATT	520	-	part of a light responsive element
Csa3G055950.1	GATA-motif	AAGATAAGATT	647	+	part of a light responsive element
Csa3G055950.1	TGA-element	AACGAC	214	-	auxin-responsive element
Csa3G101820.1	ABRE	ACGTG	1382	+	cis-acting element involved in the abscisic acid responsiveness
Csa3G101820.1	CCGTCC-box	CCGTCC	1048	-
Csa3G101820.1		motif_sequence	23	+	short_function
Csa3G101820.1		motif_sequence	70	-	short_function
Csa3G101820.1		motif_sequence	429	-	short_function
Csa3G101820.1		motif_sequence	456	-	short_function
Csa3G101820.1		motif_sequence	460	+	short_function
Csa3G101820.1		motif_sequence	519	-	short_function
Csa3G101820.1		motif_sequence	590	-	short_function
Csa3G101820.1		motif_sequence	614	-	short_function
Csa3G101820.1		motif_sequence	641	-	short_function
Csa3G101820.1		motif_sequence	645	+	short_function
Csa3G101820.1		motif_sequence	1368	+	short_function
Csa3G101820.1		motif_sequence	1812	+	short_function
Csa3G101820.1		motif_sequence	1924	+	short_function
Csa3G101820.1		motif_sequence	1963	+	short_function
Csa3G101820.1	TGA-element	AACGAC	1755	-	auxin-responsive element
Csa3G101820.1	W box	TTGACC	136	+
Csa3G101820.1	W box	TTGACC	536	+
Csa3G101820.1	ARE	AAACCA	1145	+	cis-acting regulatory element essential for the anaerobic induction
Csa3G101820.1	ARE	AAACCA	1398	-	cis-acting regulatory element essential for the anaerobic induction
Csa3G101820.1	ARE	AAACCA	1450	+	cis-acting regulatory element essential for the anaerobic induction
Csa3G101820.1	ARE	AAACCA	1992	+	cis-acting regulatory element essential for the anaerobic induction
Csa3G101820.1	MBS	CAACTG	1008	+	MYB binding site involved in drought-inducibility
Csa3G101820.1	circadian	CAAAGATATC	288	-	cis-acting regulatory element involved in circadian control
Csa3G101820.1	Box 4	ATTAAT	1438	-	part of a conserved DNA module involved in light responsiveness
Csa3G101820.1	Box 4	ATTAAT	1821	-	part of a conserved DNA module involved in light responsiveness
Csa3G101820.1	A-box	CCGTCC	1048	-	cis-acting regulatory element
Csa3G101820.1	CGTCA-motif	CGTCA	977	+	cis-acting regulatory element involved in the MeJA-responsiveness
Csa3G101820.1	CGTCA-motif	CGTCA	996	-	cis-acting regulatory element involved in the MeJA-responsiveness
Csa3G101820.1	CGTCA-motif	CGTCA	1096	+	cis-acting regulatory element involved in the MeJA-responsiveness
Csa3G101820.1	CGTCA-motif	CGTCA	1246	-	cis-acting regulatory element involved in the MeJA-responsiveness
Csa3G101820.1	STRE	AGGGG	1974	-
Csa3G101820.1	AT~TATA-box	TATATA	244	+
Csa3G101820.1	AT~TATA-box	TATATA	246	+
Csa3G101820.1	AT~TATA-box	TATATA	1639	-
Csa3G101820.1	AT~TATA-box	TATATA	1696	-
Csa3G101820.1	CAAT-box	CAAT	21	+
Csa3G101820.1	CAAT-box	CAAT	64	-
Csa3G101820.1	CAAT-box	CAAT	90	-
Csa3G101820.1	CAAT-box	CAAT	94	+
Csa3G101820.1	CAAT-box	CAAT	102	+
Csa3G101820.1	CAAT-box	CAAAT	117	+	common cis-acting element in promoter and enhancer regions
Csa3G101820.1	CAAT-box	CAAT	182	+
Csa3G101820.1	CAAT-box	CAAAT	202	+	common cis-acting element in promoter and enhancer regions
Csa3G101820.1	CAAT-box	CAAT	216	-
Csa3G101820.1	CAAT-box	CAAT	229	+
Csa3G101820.1	CAAT-box	CAAT	294	-
Csa3G101820.1	CAAT-box	CCAAT	312	-	common cis-acting element in promoter and enhancer regions
Csa3G101820.1	CAAT-box	CAAT	447	-
Csa3G101820.1	CAAT-box	CAAAT	497	-	common cis-acting element in promoter and enhancer regions
Csa3G101820.1	CAAT-box	CAAT	502	-
Csa3G101820.1	CAAT-box	CCAAT	552	-	common cis-acting element in promoter and enhancer regions
Csa3G101820.1	CAAT-box	CAAT	559	+
Csa3G101820.1	CAAT-box	CAAT	572	-
Csa3G101820.1	CAAT-box	CAAT	632	-
Csa3G101820.1	CAAT-box	CAAT	987	+
Csa3G101820.1	CAAT-box	CAAT	1066	+
Csa3G101820.1	CAAT-box	CAAT	1080	-
Csa3G101820.1	CAAT-box	CAAT	1165	-
Csa3G101820.1	CAAT-box	CAAT	1227	-
Csa3G101820.1	CAAT-box	CAAAT	1234	-	common cis-acting element in promoter and enhancer regions
Csa3G101820.1	CAAT-box	CAAAT	1240	+	common cis-acting element in promoter and enhancer regions
Csa3G101820.1	CAAT-box	CAAAT	1277	-	common cis-acting element in promoter and enhancer regions
Csa3G101820.1	CAAT-box	CAAT	1424	+
Csa3G101820.1	CAAT-box	CAAT	1429	+
Csa3G101820.1	CAAT-box	CCAAT	1453	+	common cis-acting element in promoter and enhancer regions
Csa3G101820.1	CAAT-box	CAAT	1454	+
Csa3G101820.1	CAAT-box	CAAT	1525	+
Csa3G101820.1	CAAT-box	CAAT	1602	-
Csa3G101820.1	CAAT-box	CAAT	1684	-
Csa3G101820.1	CAAT-box	CAAT	1693	+
Csa3G101820.1	CAAT-box	CAAT	1705	-
Csa3G101820.1	CAAT-box	CAAT	1873	+
Csa3G101820.1	CAAT-box	CAAT	1884	+
Csa3G101820.1	CAAT-box	CCAAT	1954	+	common cis-acting element in promoter and enhancer regions
Csa3G101820.1	CAAT-box	CAAT	1955	+
Csa3G101820.1	CAAT-box	CAAT	1998	+
Csa3G101820.1	CAAT-box	CAAT	2009	+
Csa3G101820.1	Unnamed__2	AACCTAACCT	364	-
Csa3G101820.1	TATA-box	TATA	155	+	core promoter element around -30 of transcription start
Csa3G101820.1	TATA-box	ATATAT	243	+	core promoter element around -30 of transcription start
Csa3G101820.1	TATA-box	TATATA	244	+	core promoter element around -30 of transcription start
Csa3G101820.1	TATA-box	ATATAT	245	+	core promoter element around -30 of transcription start
Csa3G101820.1	TATA-box	TATATA	246	+	core promoter element around -30 of transcription start
Csa3G101820.1	TATA-box	ATATAT	247	+	core promoter element around -30 of transcription start
Csa3G101820.1	TATA-box	TATA	248	+	core promoter element around -30 of transcription start
Csa3G101820.1	TATA-box	ATATAT	263	+	core promoter element around -30 of transcription start
Csa3G101820.1	TATA-box	TATA	264	+	core promoter element around -30 of transcription start
Csa3G101820.1	TATA-box	TATA	512	+	core promoter element around -30 of transcription start
Csa3G101820.1	TATA-box	TATAA	548	-	core promoter element around -30 of transcription start
Csa3G101820.1	TATA-box	TATA	549	+	core promoter element around -30 of transcription start
Csa3G101820.1	TATA-box	TATAAA	968	-	core promoter element around -30 of transcription start
Csa3G101820.1	TATA-box	TATAA	969	-	core promoter element around -30 of transcription start
Csa3G101820.1	TATA-box	TATA	970	+	core promoter element around -30 of transcription start
Csa3G101820.1	TATA-box	TACAAAA	1112	-	core promoter element around -30 of transcription start
Csa3G101820.1	TATA-box	TACAAAA	1286	-	core promoter element around -30 of transcription start
Csa3G101820.1	TATA-box	taTATAAAtc	1540	-	core promoter element around -30 of transcription start
Csa3G101820.1	TATA-box	TATAAAT	1541	-	core promoter element around -30 of transcription start
Csa3G101820.1	TATA-box	TATAAA	1542	-	core promoter element around -30 of transcription start
Csa3G101820.1	TATA-box	TATAA	1543	-	core promoter element around -30 of transcription start
Csa3G101820.1	TATA-box	TATA	1544	-	core promoter element around -30 of transcription start
Csa3G101820.1	TATA-box	ATATAA	1550	+	core promoter element around -30 of transcription start
Csa3G101820.1	TATA-box	TATA	1551	-	core promoter element around -30 of transcription start
Csa3G101820.1	TATA-box	ATATAA	1555	+	core promoter element around -30 of transcription start
Csa3G101820.1	TATA-box	TATA	1556	-	core promoter element around -30 of transcription start
Csa3G101820.1	TATA-box	ATATAT	1638	-	core promoter element around -30 of transcription start
Csa3G101820.1	TATA-box	TATATA	1639	-	core promoter element around -30 of transcription start
Csa3G101820.1	TATA-box	ATATAA	1640	+	core promoter element around -30 of transcription start
Csa3G101820.1	TATA-box	TATA	1641	-	core promoter element around -30 of transcription start
Csa3G101820.1	TATA-box	ATATAT	1680	-	core promoter element around -30 of transcription start
Csa3G101820.1	TATA-box	TATA	1681	-	core promoter element around -30 of transcription start
Csa3G101820.1	TATA-box	ATATAT	1695	-	core promoter element around -30 of transcription start
Csa3G101820.1	TATA-box	TATATA	1696	-	core promoter element around -30 of transcription start
Csa3G101820.1	TATA-box	ATATAA	1697	+	core promoter element around -30 of transcription start
Csa3G101820.1	TATA-box	TATA	1698	-	core promoter element around -30 of transcription start
Csa3G101820.1	TATA-box	ATTATA	1985	+	core promoter element around -30 of transcription start
Csa3G101820.1	TATA-box	TATAA	1986	-	core promoter element around -30 of transcription start
Csa3G101820.1	TATA-box	TATA	1987	-	core promoter element around -30 of transcription start
Csa3G101820.1	TATA	TATAAAAT	1544	+
Csa3G101820.1	AE-box	AGAAACAA	2004	+	part of a module for light response
Csa3G101820.1	as-1	TGACG	977	-
Csa3G101820.1	as-1	TGACG	996	+
Csa3G101820.1	as-1	TGACG	1096	-
Csa3G101820.1	as-1	TGACG	1246	+
Csa3G101820.1	AT1-motif	AATTATTTTTTATT	1578	-	part of a light responsive module
Csa3G101820.1	MRE	AACCTAA	367	-	MYB binding site involved in light responsiveness
Csa3G101820.1	G-Box	CACGTT	1381	-	cis-acting regulatory element involved in light responsiveness
Csa3G101820.1	TCA-element	CCATCTTTTT	386	+	cis-acting element involved in salicylic acid responsiveness
Csa3G101820.1	TCA-element	CCATCTTTTT	1961	+	cis-acting element involved in salicylic acid responsiveness
Csa3G101820.1	MYB-like sequence	TAACCA	545	-
Csa3G101820.1	ERE	ATTTTAAA	50	-
Csa3G101820.1	ERE	ATTTTAAA	1656	-
Csa3G101820.1	Myb	CAACTG	1008	+
Csa3G101820.1	MYB	TAACCA	545	-
Csa3G101820.1	TGACG-motif	TGACG	977	-	cis-acting regulatory element involved in the MeJA-responsiveness
Csa3G101820.1	TGACG-motif	TGACG	996	+	cis-acting regulatory element involved in the MeJA-responsiveness
Csa3G101820.1	TGACG-motif	TGACG	1096	-	cis-acting regulatory element involved in the MeJA-responsiveness
Csa3G101820.1	TGACG-motif	TGACG	1246	+	cis-acting regulatory element involved in the MeJA-responsiveness
Csa3G101820.1	Unnamed__4	CTCC	70	-
Csa3G101820.1	Unnamed__4	CTCC	519	-
Csa3G101820.1	Unnamed__4	CTCC	590	-
Csa3G101820.1	Unnamed__4	CTCC	1370	+
Csa3G101820.1	Unnamed__4	CTCC	1949	+
Csa3G101820.1	TCA	TCATCTTCAT	427	-
Csa3G101820.1	TCA	TCATCTTCAT	612	-
Csa3G101820.1	TCA	TCATCTTCAT	1532	-
Csa3G101820.1	TCA	TCATCTTCAT	1813	+
Csa3G101820.1	ATC-motif	AGTAATCT	1261	+	part of a conserved DNA module involved in light responsiveness
Csa3G101820.1	chs-CMA1a	TTACTTAA	209	-	part of a light responsive element
Csa3G101820.1	3-AF1 binding site	TAAGAGAGGAA	1938	-	light responsive element
Csa3G101820.1	CCGTCC motif	CCGTCC	1048	-
Csa3G101820.1	AAGAA-motif	GAAAGAA	372	-
Csa3G101820.1	AAGAA-motif	GAAAGAA	1218	-
Csa3G101820.1	AAGAA-motif	GAAAGAA	1738	+
Csa3G101820.1	AAGAA-motif	GAAAGAA	1903	-
Csa3G101820.1	AAGAA-motif	GAAAGAA	1907	-
Csa3G101820.1	AAGAA-motif	GAAAGAA	1966	-
Csa3G101820.1	MYC	CATTTG	117	-
Csa3G101820.1	MYC	CATTTG	202	-
Csa3G101820.1	MYC	CATGTG	541	-
Csa3G102320.1	MYC	CAATTG	225	+
Csa3G102320.1	MYC	CAATTG	992	+
Csa3G102320.1	AAGAA-motif	GAAAGAA	582	-
Csa3G102320.1	CCGTCC motif	CCGTCC	1324	-
Csa3G102320.1	Unnamed__4	CTCC	45	-
Csa3G102320.1	Unnamed__4	CTCC	339	-
Csa3G102320.1	Unnamed__4	CTCC	1851	+
Csa3G102320.1	Unnamed__4	CTCC	1964	+
Csa3G102320.1	Unnamed__4	CTCC	1967	+
Csa3G102320.1	Unnamed__4	CTCC	1982	-
Csa3G102320.1	Unnamed__4	CTCC	1988	-
Csa3G102320.1	ERE	ATTTTAAA	187	+
Csa3G102320.1	ERE	ATTTTAAA	189	-
Csa3G102320.1	ERE	ATTTTAAA	348	+
Csa3G102320.1	ERE	ATTTCATA	1341	-
Csa3G102320.1	TC-rich repeats	GTTTTCTTAC	1244	-	cis-acting element involved in defense and stress responsiveness
Csa3G102320.1	G-Box	CACGTT	1854	+	cis-acting regulatory element involved in light responsiveness
Csa3G102320.1	TGACG-motif	TGACG	431	-	cis-acting regulatory element involved in the MeJA-responsiveness
Csa3G102320.1	TCT-motif	TCTTAC	1959	+	part of a light responsive element
Csa3G102320.1	MYB	CAACCA	1076	+
Csa3G102320.1	F-box	CTATTCTCATT	1733	-
Csa3G102320.1	as-1	TGACG	431	-
Csa3G102320.1	Unnamed__1	CGTGG	1853	-
Csa3G102320.1	TCCC-motif	TCTCCCT	1986	-	part of a light responsive element
Csa3G102320.1	G-box	TACGTG	1465	+	cis-acting regulatory element involved in light responsiveness
Csa3G102320.1	Unnamed__6	taTAAATATct	436	-
Csa3G102320.1	Unnamed__6	taTAAATATct	1935	+
Csa3G102320.1	CAAT-box	CCAAT	50	+	common cis-acting element in promoter and enhancer regions
Csa3G102320.1	CAAT-box	CAAT	51	+
Csa3G102320.1	CAAT-box	CAAT	80	+
Csa3G102320.1	CAAT-box	CAAAT	179	-	common cis-acting element in promoter and enhancer regions
Csa3G102320.1	CAAT-box	CCAAT	224	+	common cis-acting element in promoter and enhancer regions
Csa3G102320.1	CAAT-box	CAAT	225	+
Csa3G102320.1	CAAT-box	CAAT	227	-
Csa3G102320.1	CAAT-box	CAAAT	233	-	common cis-acting element in promoter and enhancer regions
Csa3G102320.1	CAAT-box	CAAT	277	+
Csa3G102320.1	CAAT-box	CAAAT	310	-	common cis-acting element in promoter and enhancer regions
Csa3G102320.1	CAAT-box	CCAAT	336	-	common cis-acting element in promoter and enhancer regions
Csa3G102320.1	CAAT-box	CAAT	344	-
Csa3G102320.1	CAAT-box	CCAAT	362	+	common cis-acting element in promoter and enhancer regions
Csa3G102320.1	CAAT-box	CAAT	363	+
Csa3G102320.1	CAAT-box	CAAAT	469	+	common cis-acting element in promoter and enhancer regions
Csa3G102320.1	CAAT-box	CAAT	518	-
Csa3G102320.1	CAAT-box	CAAT	526	+
Csa3G102320.1	CAAT-box	CAAAT	553	-	common cis-acting element in promoter and enhancer regions
Csa3G102320.1	CAAT-box	CAAAT	605	-	common cis-acting element in promoter and enhancer regions
Csa3G102320.1	CAAT-box	CAAAT	618	-	common cis-acting element in promoter and enhancer regions
Csa3G102320.1	CAAT-box	CAAAT	626	+	common cis-acting element in promoter and enhancer regions
Csa3G102320.1	CAAT-box	CAAAT	673	-	common cis-acting element in promoter and enhancer regions
Csa3G102320.1	CAAT-box	CAAAT	687	-	common cis-acting element in promoter and enhancer regions
Csa3G102320.1	CAAT-box	CAAAT	746	-	common cis-acting element in promoter and enhancer regions
Csa3G102320.1	CAAT-box	CAAT	777	+
Csa3G102320.1	CAAT-box	CAAAT	788	-	common cis-acting element in promoter and enhancer regions
Csa3G102320.1	CAAT-box	CAAT	800	-
Csa3G102320.1	CAAT-box	CAAT	814	-
Csa3G102320.1	CAAT-box	CAAAT	823	-	common cis-acting element in promoter and enhancer regions
Csa3G102320.1	CAAT-box	CAAAT	834	+	common cis-acting element in promoter and enhancer regions
Csa3G102320.1	CAAT-box	CAAT	872	+
Csa3G102320.1	CAAT-box	CAAAT	883	-	common cis-acting element in promoter and enhancer regions
Csa3G102320.1	CAAT-box	CAAAT	904	-	common cis-acting element in promoter and enhancer regions
Csa3G102320.1	CAAT-box	CAAAT	925	-	common cis-acting element in promoter and enhancer regions
Csa3G102320.1	CAAT-box	CAAAT	946	-	common cis-acting element in promoter and enhancer regions
Csa3G102320.1	CAAT-box	CAAAT	957	+	common cis-acting element in promoter and enhancer regions
Csa3G102320.1	CAAT-box	CAAAT	967	+	common cis-acting element in promoter and enhancer regions
Csa3G102320.1	CAAT-box	CAAT	992	+
Csa3G102320.1	CAAT-box	CAAT	994	-
Csa3G102320.1	CAAT-box	CAAT	1024	-
Csa3G102320.1	CAAT-box	CAAAT	1033	-	common cis-acting element in promoter and enhancer regions
Csa3G102320.1	CAAT-box	CAAT	1044	+
Csa3G102320.1	CAAT-box	CAAT	1051	+
Csa3G102320.1	CAAT-box	CAAAT	1080	+	common cis-acting element in promoter and enhancer regions
Csa3G102320.1	CAAT-box	CAAAT	1122	-	common cis-acting element in promoter and enhancer regions
Csa3G102320.1	CAAT-box	CAAT	1175	-
Csa3G102320.1	CAAT-box	CAAT	1197	+
Csa3G102320.1	CAAT-box	CCAAT	1209	-	common cis-acting element in promoter and enhancer regions
Csa3G102320.1	CAAT-box	CAAT	1278	+
Csa3G102320.1	CAAT-box	CAAAT	1320	-	common cis-acting element in promoter and enhancer regions
Csa3G102320.1	CAAT-box	CCAAT	1439	+	common cis-acting element in promoter and enhancer regions
Csa3G102320.1	CAAT-box	CAAT	1440	+
Csa3G102320.1	CAAT-box	CAAT	1658	+
Csa3G102320.1	CAAT-box	CCAAT	1685	-	common cis-acting element in promoter and enhancer regions
Csa3G102320.1	CAAT-box	CAAAT	1705	-	common cis-acting element in promoter and enhancer regions
Csa3G102320.1	CAAT-box	CAAAT	1747	-	common cis-acting element in promoter and enhancer regions
Csa3G102320.1	CAAT-box	CAAT	1846	+
Csa3G102320.1	AT~TATA-box	TATATA	548	+
Csa3G102320.1	AT~TATA-box	TATATA	1935	-
Csa3G102320.1	AT~TATA-box	TATATA	1937	-
Csa3G102320.1	AE-box	AGAAACAA	1492	+	part of a module for light response
Csa3G102320.1	AE-box	AGAAACAA	1954	-	part of a module for light response
Csa3G102320.1	TATA	TATAAAAT	1115	-
Csa3G102320.1	TATA-box	ATTATA	239	+	core promoter element around -30 of transcription start
Csa3G102320.1	TATA-box	TATAA	240	-	core promoter element around -30 of transcription start
Csa3G102320.1	TATA-box	TATA	241	+	core promoter element around -30 of transcription start
Csa3G102320.1	TATA-box	TATATTTATATTT	247	-	core promoter element around -30 of transcription start
Csa3G102320.1	TATA-box	TATA	256	+	core promoter element around -30 of transcription start
Csa3G102320.1	TATA-box	TATATTTATATTT	320	-	core promoter element around -30 of transcription start
Csa3G102320.1	TATA-box	TATATTTATATTT	326	-	core promoter element around -30 of transcription start
Csa3G102320.1	TATA-box	ATATAA	328	+	core promoter element around -30 of transcription start
Csa3G102320.1	TATA-box	TATA	329	+	core promoter element around -30 of transcription start
Csa3G102320.1	TATA-box	TATTTAAA	350	-	core promoter element around -30 of transcription start
Csa3G102320.1	TATA-box	ATATAA	420	+	core promoter element around -30 of transcription start
Csa3G102320.1	TATA-box	TATA	421	+	core promoter element around -30 of transcription start
Csa3G102320.1	TATA-box	TATAAATA	439	-	core promoter element around -30 of transcription start
Csa3G102320.1	TATA-box	TATAAAT	440	-	core promoter element around -30 of transcription start
Csa3G102320.1	TATA-box	TATAAA	441	-	core promoter element around -30 of transcription start
Csa3G102320.1	TATA-box	TATAA	442	-	core promoter element around -30 of transcription start
Csa3G102320.1	TATA-box	TATA	443	+	core promoter element around -30 of transcription start
Csa3G102320.1	TATA-box	TATA	503	+	core promoter element around -30 of transcription start
Csa3G102320.1	TATA-box	TACAAAA	512	+	core promoter element around -30 of transcription start
Csa3G102320.1	TATA-box	TATATAA	547	-	core promoter element around -30 of transcription start
Csa3G102320.1	TATA-box	TATATA	548	+	core promoter element around -30 of transcription start
Csa3G102320.1	TATA-box	ATATAT	549	+	core promoter element around -30 of transcription start
Csa3G102320.1	TATA-box	TATA	550	+	core promoter element around -30 of transcription start
Csa3G102320.1	TATA-box	ATATAA	629	+	core promoter element around -30 of transcription start
Csa3G102320.1	TATA-box	TATA	630	+	core promoter element around -30 of transcription start
Csa3G102320.1	TATA-box	TATAAAT	740	-	core promoter element around -30 of transcription start
Csa3G102320.1	TATA-box	TATAAA	741	-	core promoter element around -30 of transcription start
Csa3G102320.1	TATA-box	TATAA	742	-	core promoter element around -30 of transcription start
Csa3G102320.1	TATA-box	TATA	743	+	core promoter element around -30 of transcription start
Csa3G102320.1	TATA-box	TATAAAT	782	-	core promoter element around -30 of transcription start
Csa3G102320.1	TATA-box	TATAAA	783	-	core promoter element around -30 of transcription start
Csa3G102320.1	TATA-box	TATAA	784	-	core promoter element around -30 of transcription start
Csa3G102320.1	TATA-box	TATA	785	+	core promoter element around -30 of transcription start
Csa3G102320.1	TATA-box	TACAAAA	863	-	core promoter element around -30 of transcription start
Csa3G102320.1	TATA-box	TATACA	866	-	core promoter element around -30 of transcription start
Csa3G102320.1	TATA-box	TATA	868	+	core promoter element around -30 of transcription start
Csa3G102320.1	TATA-box	TATAAA	878	-	core promoter element around -30 of transcription start
Csa3G102320.1	TATA-box	TATAA	879	-	core promoter element around -30 of transcription start
Csa3G102320.1	TATA-box	TATA	880	+	core promoter element around -30 of transcription start
Csa3G102320.1	TATA-box	TATAAAT	898	-	core promoter element around -30 of transcription start
Csa3G102320.1	TATA-box	TATAAA	899	-	core promoter element around -30 of transcription start
Csa3G102320.1	TATA-box	TATAA	900	-	core promoter element around -30 of transcription start
Csa3G102320.1	TATA-box	TATA	901	+	core promoter element around -30 of transcription start
Csa3G102320.1	TATA-box	TATA	910	+	core promoter element around -30 of transcription start
Csa3G102320.1	TATA-box	TATAAAT	919	-	core promoter element around -30 of transcription start
Csa3G102320.1	TATA-box	TATAAA	920	-	core promoter element around -30 of transcription start
Csa3G102320.1	TATA-box	TATAA	921	-	core promoter element around -30 of transcription start
Csa3G102320.1	TATA-box	TATA	922	+	core promoter element around -30 of transcription start
Csa3G102320.1	TATA-box	TAAAGATT	977	+	core promoter element around -30 of transcription start
Csa3G102320.1	TATA-box	TATA	1018	-	core promoter element around -30 of transcription start
Csa3G102320.1	TATA-box	TATAAAA	1116	-	core promoter element around -30 of transcription start
Csa3G102320.1	TATA-box	TATAAA	1117	-	core promoter element around -30 of transcription start
Csa3G102320.1	TATA-box	TATAA	1118	-	core promoter element around -30 of transcription start
Csa3G102320.1	TATA-box	TATA	1119	-	core promoter element around -30 of transcription start
Csa3G102320.1	TATA-box	TATA	1563	-	core promoter element around -30 of transcription start
Csa3G102320.1	TATA-box	TATA	1634	-	core promoter element around -30 of transcription start
Csa3G102320.1	TATA-box	TATA	1651	-	core promoter element around -30 of transcription start
Csa3G102320.1	TATA-box	TACAAAA	1666	-	core promoter element around -30 of transcription start
Csa3G102320.1	TATA-box	TATACA	1784	-	core promoter element around -30 of transcription start
Csa3G102320.1	TATA-box	TATA	1786	-	core promoter element around -30 of transcription start
Csa3G102320.1	TATA-box	TATATA	1935	-	core promoter element around -30 of transcription start
Csa3G102320.1	TATA-box	ATATAT	1936	-	core promoter element around -30 of transcription start
Csa3G102320.1	TATA-box	TATATA	1937	-	core promoter element around -30 of transcription start
Csa3G102320.1	TATA-box	ATATAT	1938	-	core promoter element around -30 of transcription start
Csa3G102320.1	TATA-box	TATA	1939	-	core promoter element around -30 of transcription start
Csa3G102320.1	ARE	AAACCA	359	+	cis-acting regulatory element essential for the anaerobic induction
Csa3G102320.1	ARE	AAACCA	1436	+	cis-acting regulatory element essential for the anaerobic induction
Csa3G102320.1	ABRE3a	TACGTG	1465	+
Csa3G102320.1	CGTCA-motif	CGTCA	431	+	cis-acting regulatory element involved in the MeJA-responsiveness
Csa3G102320.1	Box 4	ATTAAT	528	+	part of a conserved DNA module involved in light responsiveness
Csa3G102320.1	A-box	CCGTCC	1324	-	cis-acting regulatory element
Csa3G102320.1	ABRE4	CACGTA	1465	-
Csa3G102320.1	CCGTCC-box	CCGTCC	1324	-
Csa3G102320.1	ABRE	TACGGTC	1310	-	cis-acting element involved in the abscisic acid responsiveness
Csa3G102320.1	ABRE	ACGTG	1466	+	cis-acting element involved in the abscisic acid responsiveness
Csa3G102320.1	ABRE	ACGTG	1854	-	cis-acting element involved in the abscisic acid responsiveness
Csa3G102320.1	W box	TTGACC	496	-
Csa3G102320.1		motif_sequence	730	-	short_function
Csa3G102320.1		motif_sequence	772	+	short_function
Csa3G102320.1		motif_sequence	930	-	short_function
Csa3G102320.1		motif_sequence	1127	-	short_function
Csa3G102320.1		motif_sequence	1184	-	short_function
Csa3G102320.1		motif_sequence	1221	-	short_function
Csa3G102320.1		motif_sequence	1442	+	short_function
Csa3G102320.1		motif_sequence	1982	-	short_function
Csa3G102320.1		motif_sequence	1988	-	short_function
Csa3G184580.1	AT-rich sequence	TAAAATACT	1280	-	element for maximal elicitor-mediated activation (2copies)
Csa3G184580.1	chs-CMA1a	TTACTTAA	570	+	part of a light responsive element
Csa3G184580.1	WUN-motif	TTATTACAT	1556	-
Csa3G184580.1	Unnamed__4	CTCC	112	-
Csa3G184580.1	Unnamed__4	CTCC	679	+
Csa3G184580.1	Unnamed__4	CTCC	1006	-
Csa3G184580.1	Unnamed__4	CTCC	1112	+
Csa3G184580.1	Unnamed__4	CTCC	1352	-
Csa3G184580.1	Unnamed__4	CTCC	1844	-
Csa3G184580.1	Unnamed__4	CTCC	1974	+
Csa3G184580.1	Unnamed__4	CTCC	1994	+
Csa3G184580.1	Unnamed__4	CTCC	2013	+
Csa3G184580.1	CAT-box	GCCACT	672	+	cis-acting regulatory element related to meristem expression
Csa3G184580.1	ERE	ATTTTAAA	155	+
Csa3G184580.1	ERE	ATTTTAAA	535	-
Csa3G184580.1	ERE	ATTTCATA	1190	-
Csa3G184580.1	ERE	ATTTTAAA	1665	+
Csa3G184580.1	ERE	ATTTTAAA	1805	-
Csa3G184580.1	Myb	CAACTG	453	+
Csa3G184580.1	Myb	TAACTG	1403	-
Csa3G184580.1	TC-rich repeats	GTTTTCTTAC	1936	+	cis-acting element involved in defense and stress responsiveness
Csa3G184580.1	TCT-motif	TCTTAC	568	+	part of a light responsive element
Csa3G184580.1	TCT-motif	TCTTAC	1940	+	part of a light responsive element
Csa3G184580.1	TGACG-motif	TGACG	1119	-	cis-acting regulatory element involved in the MeJA-responsiveness
Csa3G184580.1	MYB	CAACAG	820	+
Csa3G184580.1	MYB	CAACCA	1701	-
Csa3G184580.1	LTR	CCGAAA	1383	-	cis-acting element involved in low-temperature responsiveness
Csa3G184580.1	as-1	TGACG	1119	-
Csa3G184580.1	AT1-motif	AATTATTTTTTATT	1889	-	part of a light responsive module
Csa3G184580.1	Unnamed__1	CGTGG	1841	+
Csa3G184580.1	Unnamed__6	taTAAATATct	1825	+
Csa3G184580.1	TCCC-motif	TCTCCCT	1973	+	part of a light responsive element
Csa3G184580.1	AT~TATA-box	TATATA	176	+
Csa3G184580.1	AT~TATA-box	TATATA	499	+
Csa3G184580.1	AT~TATA-box	TATATA	501	+
Csa3G184580.1	AT~TATA-box	TATATA	503	+
Csa3G184580.1	AT~TATA-box	TATATA	505	+
Csa3G184580.1	AT~TATA-box	TATATA	507	+
Csa3G184580.1	AT~TATA-box	TATATA	509	+
Csa3G184580.1	AT~TATA-box	TATATA	511	+
Csa3G184580.1	AT~TATA-box	TATATA	1075	-
Csa3G184580.1	AT~TATA-box	TATATA	1879	-
Csa3G184580.1	CAAT-box	CAAAT	25	-	common cis-acting element in promoter and enhancer regions
Csa3G184580.1	CAAT-box	CAAT	61	-
Csa3G184580.1	CAAT-box	CAAAT	93	+	common cis-acting element in promoter and enhancer regions
Csa3G184580.1	CAAT-box	CAAT	134	-
Csa3G184580.1	CAAT-box	CCAAT	270	+	common cis-acting element in promoter and enhancer regions
Csa3G184580.1	CAAT-box	CAAT	271	+
Csa3G184580.1	CAAT-box	CAAAT	320	-	common cis-acting element in promoter and enhancer regions
Csa3G184580.1	CAAT-box	CAAT	357	+
Csa3G184580.1	CAAT-box	CAAT	483	+
Csa3G184580.1	CAAT-box	CAAT	643	-
Csa3G184580.1	CAAT-box	CAAT	757	+
Csa3G184580.1	CAAT-box	CAAAT	761	-	common cis-acting element in promoter and enhancer regions
Csa3G184580.1	CAAT-box	CAAT	809	+
Csa3G184580.1	CAAT-box	CAAT	911	+
Csa3G184580.1	CAAT-box	CAAT	943	-
Csa3G184580.1	CAAT-box	CAAT	954	+
Csa3G184580.1	CAAT-box	CCAAT	963	-	common cis-acting element in promoter and enhancer regions
Csa3G184580.1	CAAT-box	CAAT	975	-
Csa3G184580.1	CAAT-box	CAAT	1016	-
Csa3G184580.1	CAAT-box	CAAT	1070	-
Csa3G184580.1	CAAT-box	CAAAT	1082	-	common cis-acting element in promoter and enhancer regions
Csa3G184580.1	CAAT-box	CAAAT	1122	+	common cis-acting element in promoter and enhancer regions
Csa3G184580.1	CAAT-box	CAAT	1228	-
Csa3G184580.1	CAAT-box	CAAT	1290	+
Csa3G184580.1	CAAT-box	CAAT	1300	-
Csa3G184580.1	CAAT-box	CAAAT	1313	-	common cis-acting element in promoter and enhancer regions
Csa3G184580.1	CAAT-box	CAAAT	1348	-	common cis-acting element in promoter and enhancer regions
Csa3G184580.1	CAAT-box	CAAT	1363	-
Csa3G184580.1	CAAT-box	CAAAT	1428	-	common cis-acting element in promoter and enhancer regions
Csa3G184580.1	CAAT-box	CAAT	1436	+
Csa3G184580.1	CAAT-box	CAAAT	1471	-	common cis-acting element in promoter and enhancer regions
Csa3G184580.1	CAAT-box	CAAT	1595	-
Csa3G184580.1	CAAT-box	CAAT	1625	-
Csa3G184580.1	CAAT-box	CAAAT	1832	-	common cis-acting element in promoter and enhancer regions
Csa3G184580.1	CAAT-box	CAAT	1888	+
Csa3G184580.1	CAAT-box	CCCAATTT	1898	-	common cis-acting element in promoter and enhancer regions
Csa3G184580.1	CAAT-box	CCAAT	1900	-	common cis-acting element in promoter and enhancer regions
Csa3G184580.1	CAAT-box	CAAT	1954	+
Csa3G184580.1	STRE	AGGGG	619	-
Csa3G184580.1	TATA	TATAAAAT	1821	-
Csa3G184580.1	TATA	TATAAAAT	1860	-
Csa3G184580.1	TATA-box	TATA	84	+	core promoter element around -30 of transcription start
Csa3G184580.1	TATA-box	TATA	89	+	core promoter element around -30 of transcription start
Csa3G184580.1	TATA-box	TATA	130	+	core promoter element around -30 of transcription start
Csa3G184580.1	TATA-box	TATTTAAA	157	-	core promoter element around -30 of transcription start
Csa3G184580.1	TATA-box	ATATAT	175	+	core promoter element around -30 of transcription start
Csa3G184580.1	TATA-box	TATATA	176	+	core promoter element around -30 of transcription start
Csa3G184580.1	TATA-box	ATATAA	177	+	core promoter element around -30 of transcription start
Csa3G184580.1	TATA-box	TATA	178	+	core promoter element around -30 of transcription start
Csa3G184580.1	TATA-box	ATTATA	239	+	core promoter element around -30 of transcription start
Csa3G184580.1	TATA-box	TATAA	240	-	core promoter element around -30 of transcription start
Csa3G184580.1	TATA-box	TATA	241	+	core promoter element around -30 of transcription start
Csa3G184580.1	TATA-box	ATTATA	351	+	core promoter element around -30 of transcription start
Csa3G184580.1	TATA-box	TATAA	352	-	core promoter element around -30 of transcription start
Csa3G184580.1	TATA-box	TATA	353	+	core promoter element around -30 of transcription start
Csa3G184580.1	TATA-box	ATTATA	497	+	core promoter element around -30 of transcription start
Csa3G184580.1	TATA-box	TATATAA	498	-	core promoter element around -30 of transcription start
Csa3G184580.1	TATA-box	TATATA	499	+	core promoter element around -30 of transcription start
Csa3G184580.1	TATA-box	ATATAT	500	+	core promoter element around -30 of transcription start
Csa3G184580.1	TATA-box	TATATA	501	+	core promoter element around -30 of transcription start
Csa3G184580.1	TATA-box	ATATAT	502	+	core promoter element around -30 of transcription start
Csa3G184580.1	TATA-box	TATATA	503	+	core promoter element around -30 of transcription start
Csa3G184580.1	TATA-box	ATATAT	504	+	core promoter element around -30 of transcription start
Csa3G184580.1	TATA-box	TATATA	505	+	core promoter element around -30 of transcription start
Csa3G184580.1	TATA-box	ATATAT	506	+	core promoter element around -30 of transcription start
Csa3G184580.1	TATA-box	TATATA	507	+	core promoter element around -30 of transcription start
Csa3G184580.1	TATA-box	ATATAT	508	+	core promoter element around -30 of transcription start
Csa3G184580.1	TATA-box	TATATA	509	+	core promoter element around -30 of transcription start
Csa3G184580.1	TATA-box	ATATAT	510	+	core promoter element around -30 of transcription start
Csa3G184580.1	TATA-box	TATATA	511	+	core promoter element around -30 of transcription start
Csa3G184580.1	TATA-box	ATATAT	512	+	core promoter element around -30 of transcription start
Csa3G184580.1	TATA-box	TATA	513	+	core promoter element around -30 of transcription start
Csa3G184580.1	TATA-box	TATA	623	+	core promoter element around -30 of transcription start
Csa3G184580.1	TATA-box	TACAAAA	799	+	core promoter element around -30 of transcription start
Csa3G184580.1	TATA-box	ATATAA	913	+	core promoter element around -30 of transcription start
Csa3G184580.1	TATA-box	TATA	914	+	core promoter element around -30 of transcription start
Csa3G184580.1	TATA-box	taTATAAAtc	1069	-	core promoter element around -30 of transcription start
Csa3G184580.1	TATA-box	ATATAT	1074	-	core promoter element around -30 of transcription start
Csa3G184580.1	TATA-box	TATATA	1075	-	core promoter element around -30 of transcription start
Csa3G184580.1	TATA-box	ATATAA	1076	+	core promoter element around -30 of transcription start
Csa3G184580.1	TATA-box	TATA	1077	-	core promoter element around -30 of transcription start
Csa3G184580.1	TATA-box	TACAAAA	1253	-	core promoter element around -30 of transcription start
Csa3G184580.1	TATA-box	TATTTAAA	1336	+	core promoter element around -30 of transcription start
Csa3G184580.1	TATA-box	TATTTAAA	1338	-	core promoter element around -30 of transcription start
Csa3G184580.1	TATA-box	ATATAA	1393	+	core promoter element around -30 of transcription start
Csa3G184580.1	TATA-box	TATA	1394	-	core promoter element around -30 of transcription start
Csa3G184580.1	TATA-box	TATAA	1495	-	core promoter element around -30 of transcription start
Csa3G184580.1	TATA-box	TATA	1496	-	core promoter element around -30 of transcription start
Csa3G184580.1	TATA-box	taTATAAAtc	1547	-	core promoter element around -30 of transcription start
Csa3G184580.1	TATA-box	TACATAAA	1553	-	core promoter element around -30 of transcription start
Csa3G184580.1	TATA-box	TATAAAA	1577	-	core promoter element around -30 of transcription start
Csa3G184580.1	TATA-box	TATAAA	1578	-	core promoter element around -30 of transcription start
Csa3G184580.1	TATA-box	TATAA	1579	-	core promoter element around -30 of transcription start
Csa3G184580.1	TATA-box	TATA	1580	-	core promoter element around -30 of transcription start
Csa3G184580.1	TATA-box	TACAAAA	1600	+	core promoter element around -30 of transcription start
Csa3G184580.1	TATA-box	TATA	1655	-	core promoter element around -30 of transcription start
Csa3G184580.1	TATA-box	TATAAAA	1720	-	core promoter element around -30 of transcription start
Csa3G184580.1	TATA-box	TATAAA	1721	-	core promoter element around -30 of transcription start
Csa3G184580.1	TATA-box	TATAA	1722	-	core promoter element around -30 of transcription start
Csa3G184580.1	TATA-box	TATA	1723	-	core promoter element around -30 of transcription start
Csa3G184580.1	TATA-box	ATATAA	1751	+	core promoter element around -30 of transcription start
Csa3G184580.1	TATA-box	TATA	1752	-	core promoter element around -30 of transcription start
Csa3G184580.1	TATA-box	ATATAT	1769	-	core promoter element around -30 of transcription start
Csa3G184580.1	TATA-box	TATA	1770	-	core promoter element around -30 of transcription start
Csa3G184580.1	TATA-box	TATAAAA	1822	-	core promoter element around -30 of transcription start
Csa3G184580.1	TATA-box	TATAAA	1823	-	core promoter element around -30 of transcription start
Csa3G184580.1	TATA-box	TATAA	1824	-	core promoter element around -30 of transcription start
Csa3G184580.1	TATA-box	TATA	1825	-	core promoter element around -30 of transcription start
Csa3G184580.1	TATA-box	TATAAAA	1861	-	core promoter element around -30 of transcription start
Csa3G184580.1	TATA-box	TATAAA	1862	-	core promoter element around -30 of transcription start
Csa3G184580.1	TATA-box	TATAA	1863	-	core promoter element around -30 of transcription start
Csa3G184580.1	TATA-box	TATA	1864	-	core promoter element around -30 of transcription start
Csa3G184580.1	TATA-box	ATTATA	1877	+	core promoter element around -30 of transcription start
Csa3G184580.1	TATA-box	TATATAA	1878	-	core promoter element around -30 of transcription start
Csa3G184580.1	TATA-box	TATATA	1879	-	core promoter element around -30 of transcription start
Csa3G184580.1	TATA-box	ATATAA	1880	+	core promoter element around -30 of transcription start
Csa3G184580.1	TATA-box	TATA	1881	-	core promoter element around -30 of transcription start
Csa3G184580.1	AE-box	AGAAACTT	774	-	part of a module for light response
Csa3G184580.1	MBS	CAACTG	453	+	MYB binding site involved in drought-inducibility
Csa3G184580.1	ARE	AAACCA	104	-	cis-acting regulatory element essential for the anaerobic induction
Csa3G184580.1	ARE	AAACCA	1670	+	cis-acting regulatory element essential for the anaerobic induction
Csa3G184580.1	Box 4	ATTAAT	552	+	part of a conserved DNA module involved in light responsiveness
Csa3G184580.1	Box 4	ATTAAT	1196	-	part of a conserved DNA module involved in light responsiveness
Csa3G184580.1	Box 4	ATTAAT	1570	-	part of a conserved DNA module involved in light responsiveness
Csa3G184580.1	Box 4	ATTAAT	1873	-	part of a conserved DNA module involved in light responsiveness
Csa3G184580.1	CGTCA-motif	CGTCA	1119	+	cis-acting regulatory element involved in the MeJA-responsiveness
Csa3G184580.1	W box	TTGACC	295	+
Csa3G184580.1	Myb-binding site	CAACAG	820	+
Csa3G184580.1		motif_sequence	284	+	short_function
Csa3G184580.1		motif_sequence	325	-	short_function
Csa3G184580.1		motif_sequence	332	-	short_function
Csa3G184580.1		motif_sequence	392	+	short_function
Csa3G184580.1		motif_sequence	456	+	short_function
Csa3G184580.1		motif_sequence	458	-	short_function
Csa3G184580.1		motif_sequence	1033	-	short_function
Csa3G184580.1		motif_sequence	1355	-	short_function
Csa3G184580.1		motif_sequence	1389	-	short_function
Csa3G184580.1		motif_sequence	1692	-	short_function
Csa3G184580.1		motif_sequence	1972	+	short_function
Csa3G184580.1		motif_sequence	1992	+	short_function
Csa3G184580.1		motif_sequence	2011	+	short_function
Csa3G446120.1	Unnamed__4	CTCC	44	+
Csa3G446120.1	Unnamed__4	CTCC	48	+
Csa3G446120.1	Unnamed__4	CTCC	455	+
Csa3G446120.1	Unnamed__4	CTCC	1150	-
Csa3G446120.1	Unnamed__4	CTCC	1383	-
Csa3G446120.1	Unnamed__4	CTCC	1446	-
Csa3G446120.1	Unnamed__4	CTCC	1539	+
Csa3G446120.1	Unnamed__4	CTCC	1547	+
Csa3G446120.1	Unnamed__4	CTCC	1577	-
Csa3G446120.1	Unnamed__4	CTCC	1581	-
Csa3G446120.1	Unnamed__4	CTCC	1781	+
Csa3G446120.1	Unnamed__4	CTCC	1795	+
Csa3G446120.1	Unnamed__4	CTCC	1858	-
Csa3G446120.1	Unnamed__4	CTCC	1962	+
Csa3G446120.1	Unnamed__4	CTCC	1982	+
Csa3G446120.1	ATC-motif	TGCTATCCA	1395	-	part of a conserved DNA module involved in light responsiveness
Csa3G446120.1	TC-rich repeats	ATTCTCTAAC	728	+	cis-acting element involved in defense and stress responsiveness
Csa3G446120.1	MYB-like sequence	TAACCA	75	-
Csa3G446120.1	MYB-like sequence	TAACCA	346	+
Csa3G446120.1	MYB-like sequence	TAACCA	1805	+
Csa3G446120.1	ERE	ATTTTAAA	429	+
Csa3G446120.1	ERE	ATTTTAAA	813	+
Csa3G446120.1	ERE	ATTTTAAA	1095	+
Csa3G446120.1	ERE	ATTTTAAA	1097	-
Csa3G446120.1	ERE	ATTTTAAA	1103	+
Csa3G446120.1	ERE	ATTTTAAA	1665	-
Csa3G446120.1	Myb	CAACTG	1273	+
Csa3G446120.1	MYB	TAACCA	75	-
Csa3G446120.1	MYB	TAACCA	346	+
Csa3G446120.1	MYB	TAACCA	1805	+
Csa3G446120.1	TCT-motif	TCTTAC	29	+	part of a light responsive element
Csa3G446120.1	TCT-motif	TCTTAC	334	+	part of a light responsive element
Csa3G446120.1	TGACG-motif	TGACG	798	+	cis-acting regulatory element involved in the MeJA-responsiveness
Csa3G446120.1	MYC	CAATTG	439	+
Csa3G446120.1	MYC	CATGTG	544	+
Csa3G446120.1	MYC	CATTTG	856	+
Csa3G446120.1	MYC	CATTTG	1375	-
Csa3G446120.1	Myc	TCTCTTA	997	+
Csa3G446120.1	WRE3	CCACCT	1589	-
Csa3G446120.1	ARE	AAACCA	882	-	cis-acting regulatory element essential for the anaerobic induction
Csa3G446120.1	ARE	AAACCA	1337	+	cis-acting regulatory element essential for the anaerobic induction
Csa3G446120.1	CARE	CAACTCAC	1430	+
Csa3G446120.1	MBS	CAACTG	1273	+	MYB binding site involved in drought-inducibility
Csa3G446120.1	GA-motif	ATAGATAA	296	+	part of a light responsive element
Csa3G446120.1	GT1-motif	GGTTAAT	76	+	light responsive element
Csa3G446120.1	GT1-motif	GGTTAA	345	-	light responsive element
Csa3G446120.1	GT1-motif	GGTTAAT	1803	-	light responsive element
Csa3G446120.1	GT1-motif	GGTTAA	1804	-	light responsive element
Csa3G446120.1	Box 4	ATTAAT	1350	-	part of a conserved DNA module involved in light responsiveness
Csa3G446120.1	Box 4	ATTAAT	1498	-	part of a conserved DNA module involved in light responsiveness
Csa3G446120.1	Box 4	ATTAAT	2002	-	part of a conserved DNA module involved in light responsiveness
Csa3G446120.1	CGTCA-motif	CGTCA	798	-	cis-acting regulatory element involved in the MeJA-responsiveness
Csa3G446120.1		motif_sequence	152	+	short_function
[truncated: 4,262 more rows]

## Sheet: Table S3
Supplementary Table 3. The predicted conserved motifs of the CsABCG proteins in cucumber
Motif	Sequence
Motif1	VGLPGVNGLSTEQRKRLTIAVELVANPSIIFMDEPTSGLDARAAAIVMRT
Motif2	LELLKGVSGAFRPGVLTALMGVSGAGKTTLMDVLAGRKTGG
Motif3	SGYCEQNDIHSPHVTVYESLLYSAWLRLP
Motif4	RNTVDTGRTVVCTIHQPSIDIFEAFDELLLM
Motif5	VYQGPRENVLEFFEFMGFKCPERKGVADFLQEVTSKKDQEQYWFKKSQPY
Motif6	WNLFSGFVVPKPRIPVWWIWYYWICPVAWTLYGLVASQFGD
Motif7	YNGHGMEEFVPQRTSAYISQHDLHIGEMTVRETLAFSARCQGVGPRYEML
Motif8	QPVVSIERTVFYRERAAGMYSPLPYAFSQ
Motif9	KLPVFYKQRDLLFYPSWAYALPTWILKIPITCLEVGIWVVMTYYVIGFDP
Motif10	ELSRREKEAGIKPDPEIDAYMKATAMAGQETSLITDYVLKILGLDICADI
Motif11	RGGQVIYAGPLGRNSHKLIEYFEAIPGVPKIKEKYNPATWMLEVSSVAAE
Motif12	LFMDEISTGLDSSTTYQIVKCLQQIVHLTDATVVMSLLQPAPETFDLFDD
Motif13	LYRRNKALIKELSMPSPGSKDLLFPTQYSQSFLNQCMACLWKQHLSYWRN
Motif14	SNWALFKACFSREWLLMKRNSFIYIFKTCQITVMATITFTVFLRTEMKPG
Motif15	GIIKPSRMTLLLGPPSSGKTTLLKALAGKLDDDLKLSGKVT
Motif16	LGGFVLARDDVHPWWIWGYWISPMMYAQNGIAVNEFLGHKWRH
Motif17	MVLPFQPLSLAFNNVNYYVDMPPEMKSQG
Motif18	VGDEMIRGISGGQRKRVTTGEMLVGPARA
Motif19	YIEGNIKISGYPKKQETFARI
Motif20	EDEEALRWAAIEKLPTYDRLR

## Sheet: Table S4
Supplementary Table 4. The orthologous ABCG genes pairs between cucumber and other six species
Cucumis sativus	Cucumis melo	Citrullus lanatus	Arabidopsis thaliana	Solanum lycopersicum	Zea mays	Hordeum vulgare
Csa6G185320	Cm--transcript:MELO3C025851.2.1	Cl--Cla97C02G045570.1	At--rna-NM_128548.4	Sl--rna-XM_010324025.2
Csa2G005890	Cm--transcript:MELO3C023383.2.1	Cl--Cla97C07G139740.1	At--rna-NM_128248.2		zm--rna-NM_001321723.1	hv--rna-XM_045119214.1
	Cm--transcript:MELO3C011224.2.1	Cl--Cla97C08G156300.1			zm--rna-XM_008681639.3	hv--rna-XM_045099500.1
	Cm--transcript:MELO3C004538.2.1	Cl--Cla97C09G164630.1
		Cl--Cla97C11G209140.1
Csa6G151640	Cm--transcript:MELO3C021445.2.1	Cl--Cla97C02G048030.1	At--rna-NM_129195.6	Sl--rna-XM_004250979.4
	Cm--transcript:MELO3C009452.2.1	Cl--Cla97C04G076660.1
	Cm--transcript:MELO3C024523.2.1	Cl--Cla97C10G202240.1
Csa6G450940	Cm--transcript:MELO3C021445.2.1	Cl--Cla97C02G048030.1	At--rna-NM_129195.6	Sl--rna-XM_004239673.4	zm--rna-XM_008664235.2
	Cm--transcript:MELO3C009452.2.1	Cl--Cla97C04G076660.1		Sl--rna-XM_004250979.4
	Cm--transcript:MELO3C024523.2.1	Cl--Cla97C10G202240.1		Sl--rna-XM_026028206.1
Csa3G446120	Cm--transcript:MELO3C001844.2.1	Cl--Cla97C07G139740.1	At--rna-NM_112505.4	Sl--rna-XM_004235598.4
	Cm--transcript:MELO3C012998.2.1	Cl--Cla97C07G140110.1
Csa3G813820	Cm--transcript:MELO3C009688.2.1	Cl--Cla97C10G199800.1
Csa1G407190	Cm--transcript:MELO3C025297.2.1
Csa6G366320	Cm--transcript:MELO3C011435.2.1	Cl--Cla97C08G153090.1
Csa3G814320
Csa2G379370	Cm--transcript:MELO3C023383.2.1	Cl--Cla97C07G139740.1		Sl--rna-XM_004245176.4	zm--rna-NM_001321753.2	hv--rna-XM_045120392.1
	Cm--transcript:MELO3C011224.2.1	Cl--Cla97C08G156300.1			zm--rna-XM_008681639.3	hv--rna-XM_045099500.1
	Cm--transcript:MELO3C004538.2.1	Cl--Cla97C09G164630.1
		Cl--Cla97C11G209140.1
Csa2G433930	Cm--transcript:MELO3C021823.2.1	Cl--Cla97C09G178350.1
Csa3G550680	Cm--transcript:MELO3C001844.2.1	Cl--Cla97C07G139740.1
Csa7G433950	Cm--transcript:MELO3C023383.2.1	Cl--Cla97C07G139740.1	At--rna-NM_101421.3
	Cm--transcript:MELO3C001844.2.1	Cl--Cla97C08G156300.1
	Cm--transcript:MELO3C004538.2.1	Cl--Cla97C11G209140.1
Csa1G097710	Cm--transcript:MELO3C004967.2.1	Cl--Cla97C03G053710.1	At--rna-NM_001336143.1	Sl--rna-XM_010324106.3
				Sl--rna-XM_004251109.4
Csa2G335550		Cl--Cla97C02G026670.1
Csa5G505150	Cm--transcript:MELO3C025486.2.1	Cl--Cla97C09G181690.1	At--rna-NM_129492.3	Sl--rna-XM_004236723.4	zm--rna-NM_001158032.2	hv--rna-XM_045123192.1
		Cl--Cla97C10G203980.1	At--rna-NM_115367.3	Sl--rna-XM_004239712.4
Csa5G611710	Cm--transcript:MELO3C012302.2.1	Cl--Cla97C05G103960.1		Sl--rna-XM_004238811.4	zm--rna-NM_001158522.2
Csa3G184580	Cm--transcript:MELO3C006947.2.1	Cl--Cla97C05G090650.1	At--rna-NM_118707.2	Sl--rna-XM_004234154.4
			At--rna-NM_124664.3
Csa3G101820	Cm--transcript:MELO3C016534.2.1	Cl--Cla97C10G190610.1	At--rna-NM_118876.4	Sl--rna-XM_004244156.4
				Sl--rna-XM_004252057.4
Csa4G082340	Cm--transcript:MELO3C032789.2.1	Cl--Cla97C07G137030.1	At--rna-NM_104205.2	Sl--rna-XM_010326083.3
Csa3G102320
Csa6G434400
Csa4G056620	Cm--transcript:MELO3C016221.2.1	Cl--Cla97C07G137800.1	At--rna-NM_102911.3	Sl--rna-XM_004245962.4
				Sl--rna-XM_010326193.3
Csa3G736560	Cm--transcript:MELO3C009292.2.1	Cl--Cla97C10G203980.1	At--rna-NM_129291.4	Sl--rna-XM_004246681.4	zm--rna-NM_001158032.2	hv--rna-XM_045117119.1
			At--rna-NM_115211.5		zm--rna-XM_008676631.3	hv--rna-XM_045123192.1
			At--rna-NM_115367.3		zm--rna-XM_008658865.2
					zm--rna-XM_008650379.3
Csa2G153580	Cm--transcript:MELO3C020400.2.1
Csa7G307400	Cm--transcript:MELO3C024080.2.1	Cl--Cla97C09G172820.1		Sl--rna-XM_004237718.4
Csa3G055950	Cm--transcript:MELO3C014121.2.1	Cl--Cla97C10G188910.1		Sl--rna-XM_004243981.4
Csa6G431740	Cm--transcript:MELO3C031081.2.1	Cl--Cla97C02G048940.1	At--rna-NM_121946.2
Csa1G042910	Cm--transcript:MELO3C002142.2.1	Cl--Cla97C04G077360.1
Csa6G497290	Cm--transcript:MELO3C007696.2.1
Csa5G292220
Csa3G751990	Cm--transcript:MELO3C009450.2.1	Cl--Cla97C04G076660.1	At--rna-NM_129195.6
Csa3G752490		Cl--Cla97C10G202260.1		Sl--rna-XM_026028370.1

## Sheet: Table S5
Supplementary Table 5. The RNA-seq data of tissue-specific expression of the CsABCG genes in cucumber
Gene ID	root	stem	leaf	male	female	tendril_base	tendril	ovary	ovary_fertilized	ovary_unfertilized
Csa3G736560	2.4	-5.64	-3.84	-4.64	-4.64	-5.64	-5.64	-5.64	-2.94	-1.56
Csa7G433950	-1.79	-3.47	-0.18	4.65	2.85	-4.32	-2.47	0.76	0.36	1.75
Csa3G101820	-5.64	-5.64	-5.64	0.12	-5.64	-5.64	-5.64	-5.64	-5.64	-5.64
Csa6G151640	-0.07	-4.64	-3.84	-5.64	-4.06	-5.64	-5.64	-4.64	-3.47	-1.56
Csa1G407190	-5.64	-5.64	-5.64	-5.64	-5.64	-5.06	-5.06	-5.64	-4.64	-5.64
Csa1G042910	-2	-1.74	-1.51	-5.64	-3.84	-4.64	-2.84	-2.94	-2.56	-1.43
Csa3G102320	-5.64	0.32	1.06	-2.56	-2.84	0.58	0.12	-1.22	-3.84	-5.64
Csa3G055950	-5.64	-4.32	-1.56	-4.64	-2.4	-5.64	-5.64	-3.64	-2.74	-3.64
Csa6G185320	-0.23	-5.64	-3.84	2.81	-3.64	-5.64	-5.64	-3.18	-4.06	-3.32
Csa4G082340	0.93	-0.64	0.2	-0.47	-1.09	-4.06	-5.64	-1.25	-0.94	0.28
Csa5G505150	2.82	-3.06	-0.76	2.99	-0.67	-4.32	-2	-1.25	-1.03	0.18
Csa6G450940	4.03	-2	-1.64	-0.14	-0.69	-1.6	-2.94	-1.64	-1.84	-1.56
Csa3G184580	4.12	4.18	3.41	-2.94	2.58	1.49	1.6	3.94	3.83	2.71
Csa3G752490	4.31	3.46	3.34	3.47	3.53	-2.84	-2.06	4.45	4.46	5.41
Csa6G497290	-1.25	-1.74	-0.86	-0.27	-1.29	-2.74	-2.25	-1.47	-1.4	-0.84
Csa5G292220	0.95	-2.25	-0.36	-1.64	-1.64	-2.32	-1.15	-1.84	-1.43	-0.18
Csa2G379370	-0.4	1.56	0.64	-0.43	1.19	-1.94	-0.6	1.15	1.42	0.54
Csa3G446120	5.72	0.64	-0.43	1.38	1.1	-1.74	-1.22	0.45	0.7	3.09
Csa3G814320	3.3	-0.49	-1.09	0.21	-0.09	-1.06	-1.69	-0.56	0.56	0.8
Csa6G434400	-0.76	2.68	4.46	5.6	5.07	2.2	2.28	3.5	2.63	2.78
Csa2G153580	3.1	0.23	0.52	3.03	2.14	-0.22	0.28	1.51	1.5	1.63
Csa3G751990	4.49	3.88	4.41	4.17	4.4	-0.2	0.01	4.71	4.65	5.76
Csa2G433930	5.92	0.46	1.02	1.49	0.86	-0.1	0.57	1.81	1.76	0.49
Csa6G366320	0.96	0.91	1.53	6.25	4.7	-0.06	0.31	1.84	2.06	2.9
Csa3G550680	0.15	1.29	2.64	3.61	1.2	2.16	2.81	0.88	1.19	1.58
Csa7G307400	4.27	3.14	1.82	2.5	2.34	0.86	0.53	1.79	1.57	3.14
Csa6G431740	2.6	2.18	1.99	1.61	2.13	0.88	1.14	2.52	2.42	2.79
Csa3G813820	5.92	2.1	1.93	4.83	3.14	1.18	1.37	2.5	2.66	3.53
Csa5G611710	2.15	4.44	5.34	3.26	3.92	2.7	2.9	4.04	4.54	4.57
Csa4G056620	5.8	4.36	3.22	4.34	4.49	2.95	2.59	3.87	4.12	4.47
Csa2G335550	4.05	3.3	4.36	3.44	4.65	3.25	3.18	4.9	4	2.84
Csa1G097710	5.29	4.85	4.56	3.9	4.1	2.95	3.43	5.6	5.37	4.77
Csa2G005890	3.52	3.61	4.28	4.78	4.64	3.1	3.39	3.23	3.29	3.17

## Sheet: Table S6
Supplementary Table 6. The RNA-seq data of the CsABCG genes in a partial region in the root tip of cucumber
Gene ID	CsEZ	CsDZ	CsMZ
Csa3G736560	-6.64	-6.64	-6.64
Csa3G102320	-6.64	-6.64	-6.64
Csa3G055950	-6.64	-6.64	-6.64
Csa1G042910	-3.47	0	-6.64
Csa3G550680	-0.34	4.18	-5.64
Csa1G407190	-4.64	-5.64	-3.64
Csa2G153580	0.83	1.64	-5.64
Csa5G505150	-5.64	-0.64	-4.32
Csa3G101820	-5.64	-3.32	-5.06
Csa6G185320	-4.64	-2.25	-3.84
Csa7G433950	-3.47	-4.64	-4.06
Csa2G005890	-2.47	-2.4	-3.47
Csa3G813820	-1.51	1.44	-2.25
Csa6G434400	-2.25	-1.94	-1.06
Csa4G082340	-2	-0.54	-1.64
Csa6G497290	-1.89	-0.6	-1.94
Csa3G446120	-1.51	4.42	-1.84
Csa3G814320	-1.29	3.57	-1.84
Csa6G366320	-0.49	-1.64	-0.6
Csa6G431740	-0.3	-0.81	0.42
Csa3G184580	1.35	-0.69	2.06
Csa3G752490	0.36	0.52	-0.49
Csa6G151640	-0.25	0.72	0.21
Csa2G335550	2.31	-0.06	2.09
Csa7G307400	1.42	2.13	0.3
Csa6G450940	2.77	4.31	1.08
Csa3G751990	1.57	1.6	1.16
Csa5G611710	1.67	1.5	2.98
Csa5G292220	1.99	3.67	1.88
Csa2G379370	3.49	4.41	1.89
Csa4G056620	2.73	4.06	2.21
Csa1G097710	4.2	3.68	4.01
Csa2G433930	4.68	5.45	4.59

## Sheet: Table S7
Supplementary Table7. The RNA-seq data of cucumber CsABCG genes expression in Cs_line408 (long fruit), Cs_line409 (short fruit)
Gene ID	Cs_line408	Cs_line409
Csa3G101820	-6.64	-6.64
Csa3G102320	-2.69	-6.64
Csa1G407190	-6.64	-3.94
Csa6G185320	-5.32	-2.64
Csa3G055950	-4.64	-4.84
Csa6G450940	-2.06	-4.64
Csa3G736560	-3.56	-3
Csa1G042910	-3.12	-2.18
Csa6G151640	-3.12	0.29
Csa7G433950	-0.89	-1.79
Csa4G082340	-1	-0.58
Csa2G379370	-0.12	-0.93
Csa6G497290	-0.66	-0.4
Csa3G814320	-0.58	-0.62
Csa3G550680	-0.26	-0.45
Csa5G292220	0.44	0.18
Csa5G505150	0.36	0.42
Csa3G446120	1.42	0.6
Csa3G813820	1.78	2.1
Csa6G431740	2.41	1.8
Csa7G307400	1.96	3.15
Csa2G433930	3.07	2.3
Csa2G153580	2.43	3.08
Csa2G005890	3.91	2.53
Csa6G366320	3.5	6.15
Csa4G056620	3.86	3.8
Csa1G097710	4.79	3.86
Csa3G184580	5.14	3.98
Csa5G611710	4.37	4.58
Csa6G434400	4.39	4.46
Csa3G752490	4.53	5.52
Csa3G751990	4.75	5.65
Csa2G335550	6.97	5.63

## Sheet: Table S8
Supplementary Table 8. The RNA-seq data of the CsABCG genes expression responding to downy mildew in cucumber
Gene ID	0hpi	6hpi	24hpi
Csa3G736560	-4.47	-6.64	-5.64
Csa3G101820	-6.64	-6.64	-6.64
Csa3G102320	-6.64	-6.64	-6.64
Csa3G055950	-3.64	-6.64	-2.43
Csa1G407190	-6.06	-6.06	-6.64
Csa6G151640	-2.56	-4.32	-6.64
Csa1G042910	-2.64	-5.64	-3.32
Csa2G335550	-5.32	0.57	-1.17
Csa5G292220	-2.51	-2.94	-3.94
Csa6G450940	-3.25	-2.89	-3
Csa7G433950	-2.64	-2.06	-1.94
Csa3G814320	-1.32	-2.47	-1.03
Csa5G505150	-0.14	-2.18	-1.2
Csa6G185320	0.59	-0.96	0.1
Csa2G379370	0.29	-0.22	-0.67
Csa6G497290	1.1	0.3	-0.56
Csa3G550680	-0.33	0.4	1.63
Csa3G184580	1.62	3.37	0.2
Csa4G082340	0.52	0.44	0.43
Csa6G366320	0.51	0.68	0.77
Csa2G433930	4.61	2.21	0.59
Csa2G153580	2.75	1.96	0.81
Csa6G431740	4.59	1.99	1.02
Csa3G752490	1.11	1.18	2.15
Csa3G751990	1.44	1.88	2.64
Csa6G434400	4.51	2.21	1.68
Csa7G307400	4.21	1.81	2.3
Csa2G005890	2.76	3.32	2
Csa4G056620	2.84	2.79	2.59
Csa3G446120	6.1	4.71	3.28
Csa3G813820	4.06	3.34	5.21
Csa1G097710	3.86	3.59	3.98
Csa5G611710	5.08	5.07	5.74

## Sheet: Table S9
Supplementary Table 9. The RNA-seq data of the CsABCG genes expression responding to low-temperature stress in cucumber
Gene ID	0h	2h	6h	12h
Csa3G736560	-6.64	-6.64	-6.64	-6.64
Csa3G101820	-6.64	-6.64	-6.64	-6.64
Csa1G407190	-6.64	-6.64	-6.64	-6.64
Csa3G102320	-6.64	-6.64	-6.64	-6.64
Csa3G055950	-3.99	-3.9	-6.64	-3.52
Csa6G151640	-3.7	-3.47	-4.24	-1.82
Csa1G042910	-2.94	-3.59	-2.32	-0.35
Csa7G433950	-3.37	-2.87	-2.67	-2.74
Csa2G379370	-2.42	-2.81	-2.91	-2.81
Csa4G082340	-2.84	-1.89	-1.45	-0.94
Csa6G450940	-2.18	-2.18	-1.84	-1.12
Csa5G292220	-1.33	-1.54	-1.87	-2.04
Csa3G814320	-0.64	-1.24	-1	-1.32
Csa6G497290	-0.92	-1.24	0.68	3.36
Csa5G505150	-0.49	-0.76	-0.71	-1.08
Csa6G185320	-0.91	-0.32	-0.04	-0.68
Csa6G431740	-0.38	0.08	-0.01	1.82
Csa4G056620	1.49	1.43	0.44	-0.36
Csa3G550680	0.07	0.58	0.12	0.38
Csa2G153580	1.66	1.74	1.61	1.04
Csa3G184580	2.19	2.29	3.02	1.44
Csa7G307400	3.32	3.08	2.82	2.24
Csa6G366320	2.94	3.12	2.62	3.58
Csa1G097710	2.75	2.81	3.05	3.16
Csa2G433930	2.77	3.06	3.13	4.26
Csa6G434400	3.65	3.5	3.46	3.12
Csa2G335550	3.84	3.98	3.75	3.29
Csa3G751990	3.67	3.49	3.37	3.39
Csa3G752490	3.9	3.81	3.69	3.53
Csa2G005890	4.46	4.18	4.54	3.88
Csa3G813820	4.51	4.49	4.41	4.35
Csa3G446120	5.32	5.76	7.5	6.99
Csa5G611710	5.48	5.55	5.61	5.77

## Sheet: Table S10
Supplementary Table 10. The RNA-seq data of the CsABCG genes expression responding to salt stress in cucumber
Gene ID	Control	NaCl
Csa3G102320	-7.16	-4.24
Csa3G736560	-7.16	-4.54
Csa3G055950	-6.27	2.24
Csa3G101820	-4.92	-5.88
Csa1G407190	-4.64	-3.78
Csa5G505150	-2.71	-3.37
Csa7G433950	-3.22	2.43
Csa1G042910	-3.18	4.33
Csa6G151640	-3.18	4.09
Csa2G335550	2.46	-2.45
Csa2G005890	-2.04	-1.36
Csa3G814320	-1.63	1.57
Csa6G434400	-1.6	-0.8
Csa3G550680	2.41	-1.46
Csa2G153580	2	-1.3
Csa6G185320	-0.43	4.2
Csa3G184580	2.25	-0.13
Csa6G497290	0.24	1.23
Csa4G082340	0.26	0.58
Csa2G379370	1.94	0.28
Csa6G366320	0.44	1.76
Csa6G431740	1.21	6.19
Csa4G056620	4.96	1.31
Csa5G611710	2.76	1.43
Csa7G307400	2.22	3.23
Csa3G752490	2.44	2.89
Csa5G292220	2.64	4.87
Csa3G751990	2.88	5.09
Csa3G813820	3.05	3.34
Csa2G433930	5.4	3.55
Csa3G446120	6.75	4.29
Csa1G097710	4.87	4.46
Csa6G450940	5.85	6.59

[truncated: 4 more sheets: Table S11, Table S12, Table S13, Table S14]
